# Supplementary material for: Ti and Zr complexes bearing guanidine-phenolate ligands: coordination chemistry and polymerization studies
Source: Royal Society of Chemistry journal article supplement (doi:10.1039/d4ra05146g), 2024-01-01
Supplement: d4ra05146g1.pdf [file d4ra05146g1.pdf]

**Ti and Zr complexes bearing guanidine–phenolate ligands:  
coordination chemistry and polymerization studies**

Víctor Flores-Romero, Jesse LeBlanc, Zichuan Chen and Gino G. Lavoie\*

York University, Department of Chemistry

Toronto, Canada

Electronic Supporting Information

## Table of Contents

|                                                                                                          |     |
|----------------------------------------------------------------------------------------------------------|-----|
| Figure S1. $^1\text{H}$ NMR spectrum of 1Cl (400 MHz, $\text{CDCl}_3$ ).....                             | S5  |
| Figure S2. $^{13}\text{C}\{^1\text{H}\}$ NMR spectrum of 1Cl (100 MHz, $\text{CDCl}_3$ ).....            | S5  |
| Figure S3. $^1\text{H}$ NMR spectrum of 2Cl (300 MHz, $\text{CDCl}_3$ ).....                             | S6  |
| Figure S4. $^{13}\text{C}\{^1\text{H}\}$ NMR spectrum of 2Cl (100 MHz, $\text{CDCl}_3$ ).....            | S6  |
| Figure S5. $^1\text{H}$ NMR spectrum of L1H (300 MHz, $\text{CDCl}_3$ ).....                             | S7  |
| Figure S6. $^{13}\text{C}\{^1\text{H}\}$ NMR spectrum of L1H (75 MHz, $\text{CDCl}_3$ ).....             | S7  |
| Figure S7. $^1\text{H}$ NMR spectrum of L1H·HCl (400 MHz, $\text{D}_2\text{O}$ ).....                    | S8  |
| Figure S8. $^{13}\text{C}\{^1\text{H}\}$ NMR spectrum of L1H·HCl (100 MHz, $\text{D}_2\text{O}$ ).....   | S8  |
| Figure S9. $^1\text{H}$ NMR spectrum of L1'H (400 MHz, $\text{CDCl}_3$ ).....                            | S9  |
| Figure S10. $^{13}\text{C}\{^1\text{H}\}$ NMR spectrum of L1'H (75 MHz, $\text{CDCl}_3$ ).....           | S9  |
| Figure S11. $^1\text{H}$ NMR spectrum of L1'H·HCl (400 MHz, $\text{CDCl}_3$ ).....                       | S10 |
| Figure S12. $^{13}\text{C}$ NMR spectrum of L1'H·HCl (100 MHz, $\text{CDCl}_3$ ).....                    | S10 |
| Figure S13. $^1\text{H}$ NMR spectrum of L2H·HCl (300 MHz, $\text{CDCl}_3$ ).....                        | S11 |
| Figure S14. $^{13}\text{C}\{^1\text{H}\}$ NMR spectrum of L2H·HCl (75 MHz, $\text{CDCl}_3$ ).....        | S11 |
| Figure S15. $^1\text{H}$ NMR spectrum of L2H (300 MHz, $\text{CDCl}_3$ ).....                            | S12 |
| Figure S16. $^{13}\text{C}\{^1\text{H}\}$ NMR spectrum of L2H (75 MHz, $\text{CDCl}_3$ ).....            | S12 |
| Figure S17. $^1\text{H}$ NMR spectrum of L4H·HCl (400 MHz, $\text{CDCl}_3$ ).....                        | S13 |
| Figure S18. $^{13}\text{C}\{^1\text{H}\}$ NMR spectrum of L4H·HCl (100 MHz, $\text{CDCl}_3$ ).....       | S13 |
| Figure S19. $^1\text{H}$ NMR spectrum of L4H (400 MHz, $\text{C}_6\text{D}_6$ ).....                     | S14 |
| Figure S20. $^{13}\text{C}\{^1\text{H}\}$ NMR spectrum of L4H (100 MHz, $\text{C}_6\text{D}_6$ ).....    | S14 |
| Figure S21. $^1\text{H}$ NMR spectrum of Ti1a (400 MHz, $\text{C}_6\text{D}_6$ ).....                    | S15 |
| Figure S22. $^{13}\text{C}\{^1\text{H}\}$ NMR spectrum of Ti1a (100 MHz, $\text{C}_6\text{D}_6$ ).....   | S15 |
| Figure S23. $^1\text{H}$ NMR spectrum of Ti1'a (400 MHz, $\text{C}_6\text{D}_6$ ).....                   | S16 |
| Figure S24. $^{13}\text{C}\{^1\text{H}\}$ NMR spectrum of Ti1'a (100 MHz, $\text{C}_6\text{D}_6$ ).....  | S16 |
| Figure S25. $^1\text{H}$ NMR spectrum of Zr1a (400 MHz, $\text{C}_6\text{D}_6$ ).....                    | S17 |
| Figure S26. $^{13}\text{C}\{^1\text{H}\}$ NMR spectrum of Zr1a (100 MHz, $\text{C}_6\text{D}_6$ ).....   | S17 |
| Figure S27. $^1\text{H}$ NMR spectrum of Zr1'a (400 MHz, $\text{C}_6\text{D}_6$ ).....                   | S18 |
| Figure S28. $^{13}\text{C}\{^1\text{H}\}$ NMR spectrum of Zr1'a (100 MHz, $\text{C}_6\text{D}_6$ ).....  | S18 |
| Figure S29. $^1\text{H}$ NMR spectrum of Ti2a (400 MHz, $\text{C}_6\text{D}_6$ ).....                    | S19 |
| Figure S30. $^{13}\text{C}\{^1\text{H}\}$ NMR spectrum of Ti2a (75 MHz, $\text{CDCl}_3$ ).....           | S19 |
| Figure S31. $^1\text{H}$ - $^1\text{H}$ COSY spectrum of Ti2a (400 MHz, $\text{C}_6\text{D}_6$ ).....    | S20 |
| Figure S32. $^1\text{H}$ - $^{13}\text{C}$ HSQC spectrum of Ti2a (400 MHz, $\text{C}_6\text{D}_6$ )..... | S21 |

|                                                                                                                                                                                              |     |
|----------------------------------------------------------------------------------------------------------------------------------------------------------------------------------------------|-----|
| Figure S33. $^1\text{H}$ NMR spectrum of Zr2a (300 MHz, $\text{C}_6\text{D}_6$ ) .....                                                                                                       | S22 |
| Figure S34. $^{13}\text{C}\{^1\text{H}\}$ NMR spectrum of Zr2a (75 MHz, $\text{C}_6\text{D}_6$ ) .....                                                                                       | S22 |
| Figure S35. $^1\text{H}$ - $^1\text{H}$ COSY spectrum of Zr2a (400 MHz, $\text{C}_6\text{D}_6$ ) .....                                                                                       | S23 |
| Figure S36. $^1\text{H}$ - $^{13}\text{C}$ HSQC spectrum of Zr2a (400 MHz, $\text{C}_6\text{D}_6$ ).....                                                                                     | S24 |
| Figure S37. $^1\text{H}$ NMR spectrum of Ti3a (300 MHz, $\text{C}_6\text{D}_6$ ) .....                                                                                                       | S25 |
| Figure S38. $^{13}\text{C}\{^1\text{H}\}$ NMR spectrum of Ti3a (75 MHz, $\text{C}_6\text{D}_6$ ).....                                                                                        | S25 |
| Figure S39. $^1\text{H}$ NMR spectrum of Zr3a (400 MHz, $\text{C}_6\text{D}_6$ ) .....                                                                                                       | S26 |
| Figure S40. $^{13}\text{C}\{^1\text{H}\}$ NMR spectrum of Zr3a (100 MHz, $\text{C}_6\text{D}_6$ ) .....                                                                                      | S26 |
| Figure S41. $^1\text{H}$ NMR spectrum of Ti4a (300 MHz, $\text{C}_6\text{D}_6$ ) .....                                                                                                       | S27 |
| Figure S42. $^{13}\text{C}\{^1\text{H}\}$ NMR spectrum of Ti4a (75 MHz, $\text{C}_6\text{D}_6$ ).....                                                                                        | S27 |
| Figure S43. $^1\text{H}$ NMR spectrum of Zr4a (400 MHz, $\text{C}_6\text{D}_6$ ) .....                                                                                                       | S28 |
| Figure S44. $^{13}\text{C}\{^1\text{H}\}$ NMR spectrum of Zr4a (100 MHz, $\text{C}_6\text{D}_6$ ) .....                                                                                      | S28 |
| Figure S45. $^1\text{H}$ NMR spectrum of Ti1b (400 MHz, $\text{C}_6\text{D}_6$ ) .....                                                                                                       | S29 |
| Figure S46. $^{13}\text{C}\{^1\text{H}\}$ NMR spectrum of Ti1b (100 MHz, $\text{C}_6\text{D}_6$ ) .....                                                                                      | S29 |
| Figure S47. $^1\text{H}$ NMR spectrum of Ti1'b (400 MHz, $\text{CDCl}_3$ ).....                                                                                                              | S30 |
| Figure S48. $^{13}\text{C}\{^1\text{H}\}$ NMR spectrum of Ti1'b (100 MHz, $\text{CDCl}_3$ ).....                                                                                             | S30 |
| Figure S49. $^1\text{H}$ NMR spectrum of Ti2b (400 MHz, $\text{CDCl}_3$ ).....                                                                                                               | S31 |
| Figure S50. $^{13}\text{C}\{^1\text{H}\}$ NMR spectrum of Ti2b (100 MHz, $\text{CDCl}_3$ ).....                                                                                              | S31 |
| Figure S51. $^1\text{H}$ NMR spectrum of the polymer produced with Zr2a (400 MHz, $\text{CDCl}_3$ ) .....                                                                                    | S32 |
| Figure S52. Homonuclear-decoupled $^1\text{H}$ NMR spectrum of the polymer produced with Zr2a (400 MHz, $\text{CDCl}_3$ ) .....                                                              | S32 |
| Figure S53. $^{13}\text{C}\{^1\text{H}\}$ spectrum of the polymer produced with Zr2a (100 MHz, $\text{CDCl}_3$ ) .....                                                                       | S33 |
| Figure S54. Kinetic plot for the polymerization of <i>rac</i> -lactide by $\text{Sn}(\text{Oct})_2$ , $\text{Ti}(\text{OiPr})_4$ , Ti1a, Ti1'a, Ti2a, Ti3a, and Ti4a. ....                   | S33 |
| Figure S55. Kinetic plot for the polymerization of <i>rac</i> -lactide by $\text{Sn}(\text{Oct})_2$ , $\text{Zr}(\text{OiPr})_4$ , $^i\text{PrOH}$ , Zr1a, Zr1'a, Zr2a, Zr3a, and Zr4a. .... | S34 |
| Figure S56. Kinetic plot for the polymerization of <i>rac</i> -lactide by L2H, Zr2a with purified monomer and Zr2a + $^i\text{PrOH}$ .....                                                   | S34 |
| Figure S57. Number-average molecular weight of PLA produced by Zr2a as a function of conversion. ....                                                                                        | S35 |
| Figure S58. Decay Zr2a as a function of time when dissolved in toluene and heated to 120 °C.....                                                                                             | S35 |
| Figure S59. Representative GPC chromatogram plot of a polymer sample, herein obtained using complex Zr1a (entry 6).....                                                                      | S36 |
| Figure S60. MALDI-TOF mass spectrum of the polymer obtained using complex Ti2a.....                                                                                                          | S36 |
| Figure S61. MALDI-TOF mass spectrum of the polymer obtained using complex Zr2a .....                                                                                                         | S37 |

|                                                                                                                                              |     |
|----------------------------------------------------------------------------------------------------------------------------------------------|-----|
| Figure S62 MALDI-TOF mass spectrum of the polymer obtained using complex L2H .....                                                           | S37 |
| Table S1. Relative energies (kJ mol <sup>-1</sup> ) of the five diastereoisomers for the bis(alkoxide) complexes Ti3a , Zr3a, and Ti4a ..... | S38 |
| Table S2. Rate constant of the polymerization of <i>rac</i> -lactide.....                                                                    | S38 |
| Table S3. Crystal data for Ti3a .....                                                                                                        | S39 |
| Table S4. Crystal data for Zr3a .....                                                                                                        | S40 |
| Table S5. Crystal data for Ti4a .....                                                                                                        | S41 |
| Table S6. Crystal data for Ti2b .....                                                                                                        | S42 |

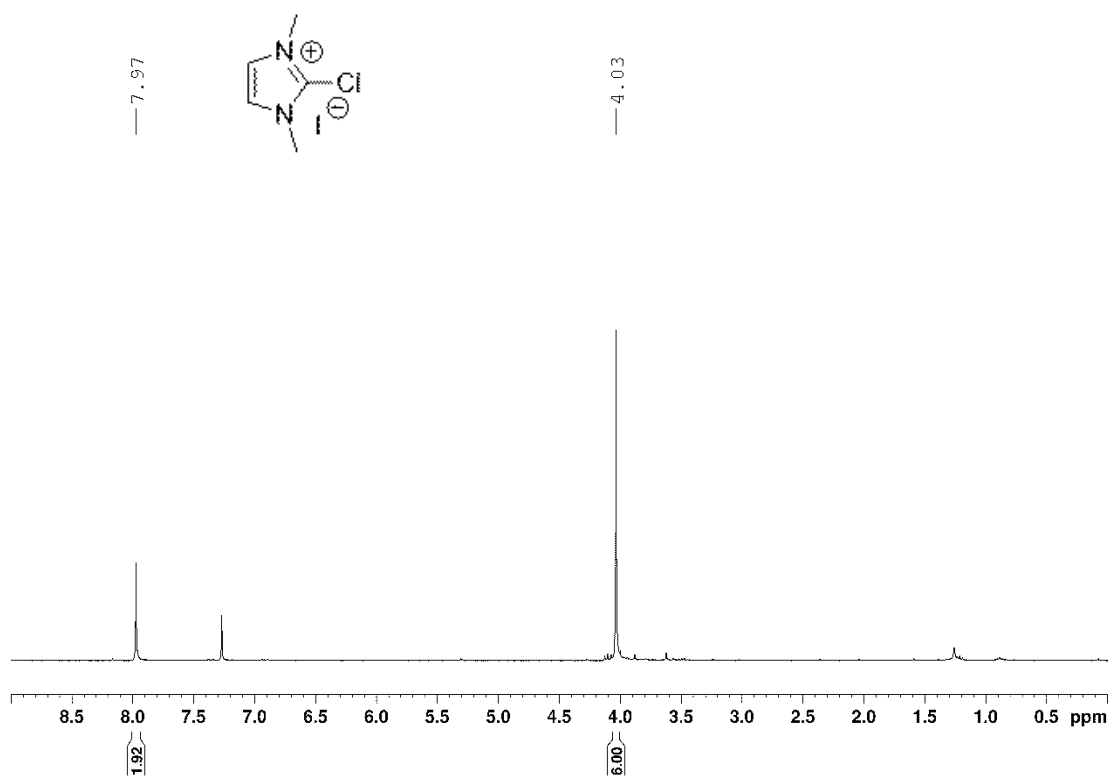

Figure S1.  $^1\text{H}$  NMR spectrum of 1Cl (400 MHz,  $\text{CDCl}_3$ )

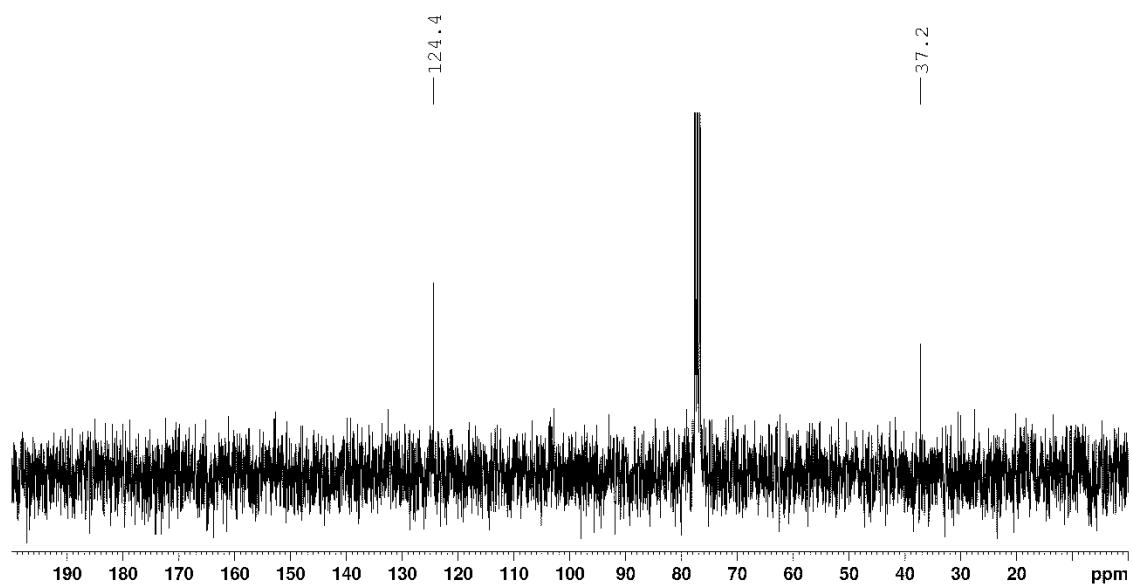

Figure S2.  $^{13}\text{C}\{^1\text{H}\}$  NMR spectrum of 1Cl (100 MHz,  $\text{CDCl}_3$ )

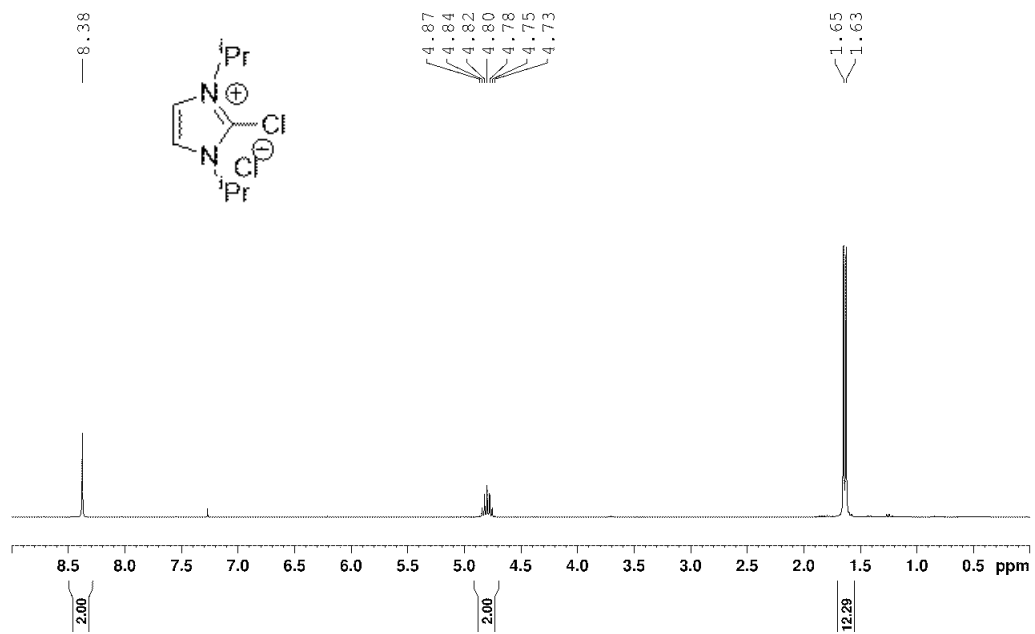

Figure S3.  $^1\text{H}$  NMR spectrum of 2Cl (300 MHz,  $\text{CDCl}_3$ )

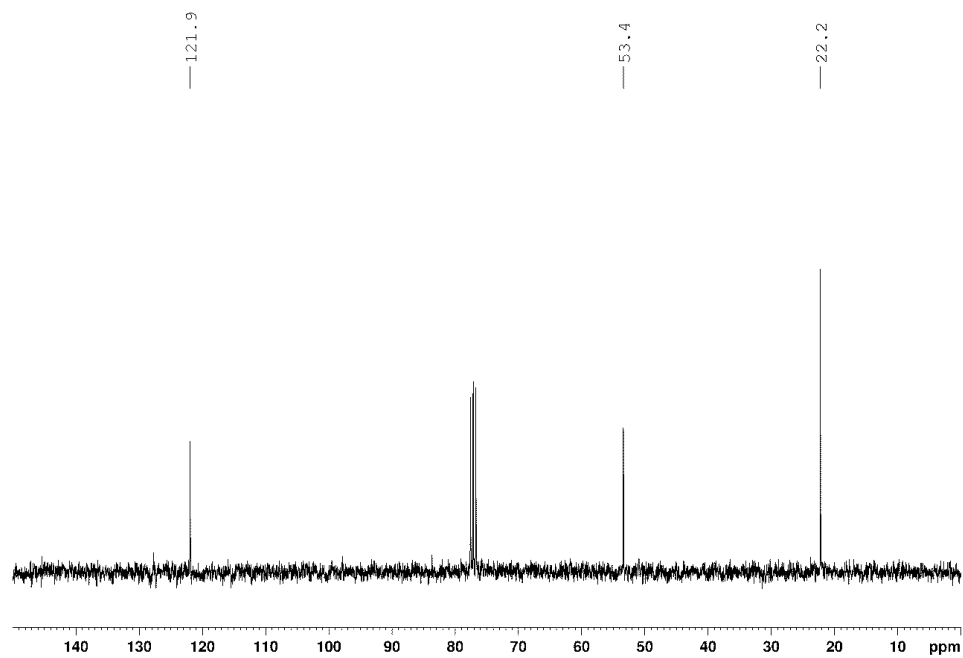

Figure S4.  $^{13}\text{C}\{^1\text{H}\}$  NMR spectrum of 2Cl (100 MHz,  $\text{CDCl}_3$ )

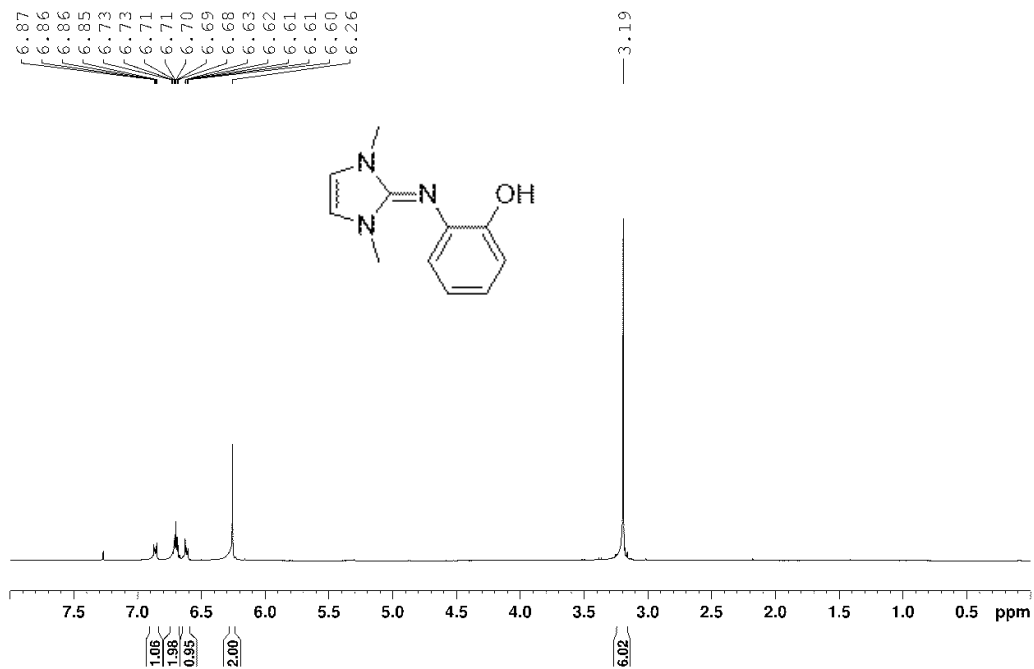

Figure S5. <sup>1</sup>H NMR spectrum of L1H (300 MHz, CDCl<sub>3</sub>)

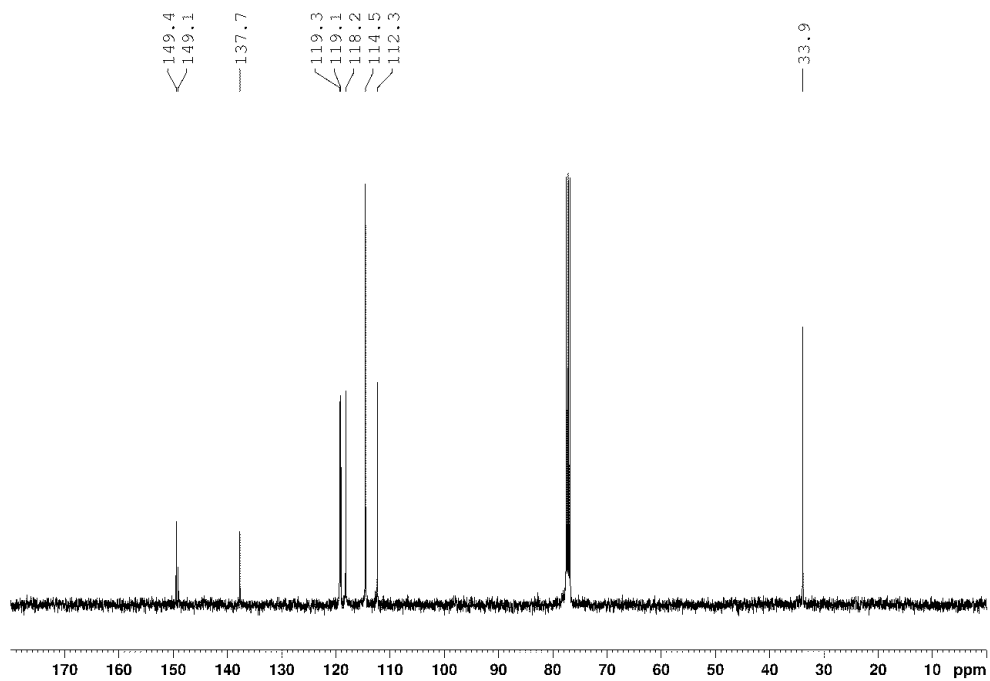

Figure S6. <sup>13</sup>C{<sup>1</sup>H} NMR spectrum of L1H (75 MHz, CDCl<sub>3</sub>)

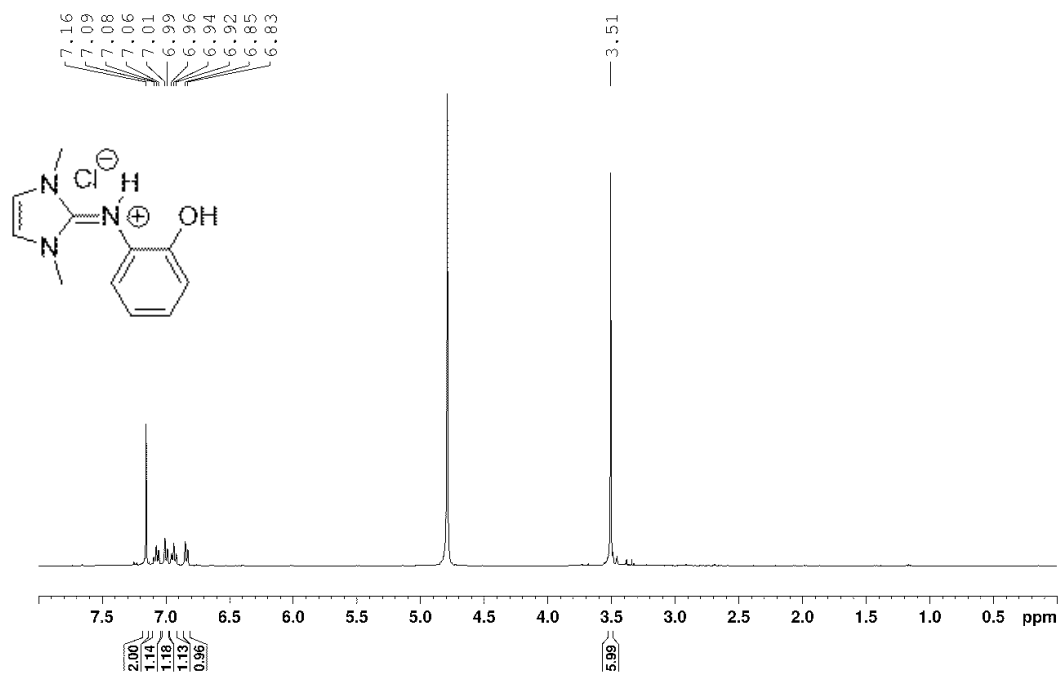

Figure S7. <sup>1</sup>H NMR spectrum of L1H·HCl (400 MHz, D<sub>2</sub>O)

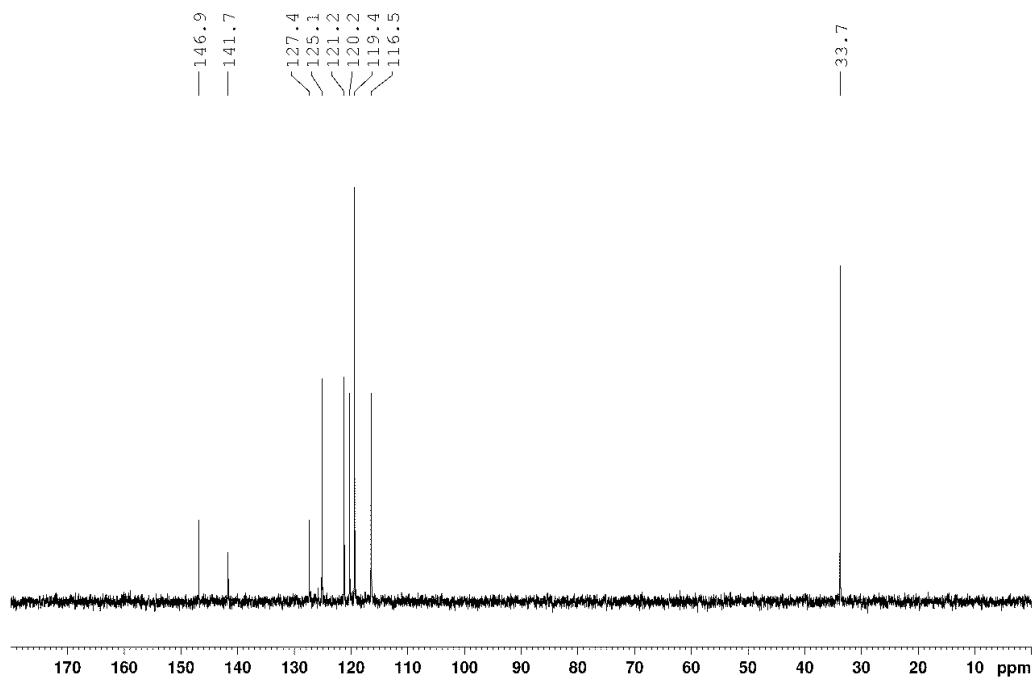

Figure S8. <sup>13</sup>C{<sup>1</sup>H} NMR spectrum of L1H·HCl (100 MHz, D<sub>2</sub>O)



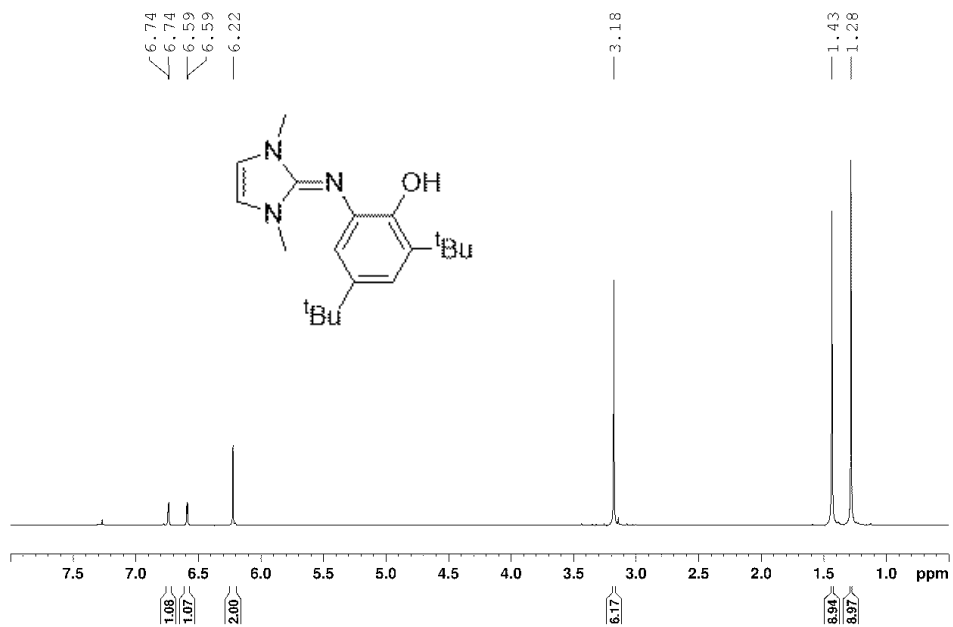

Figure S9. <sup>1</sup>H NMR spectrum of L1'H (400 MHz, CDCl<sub>3</sub>)

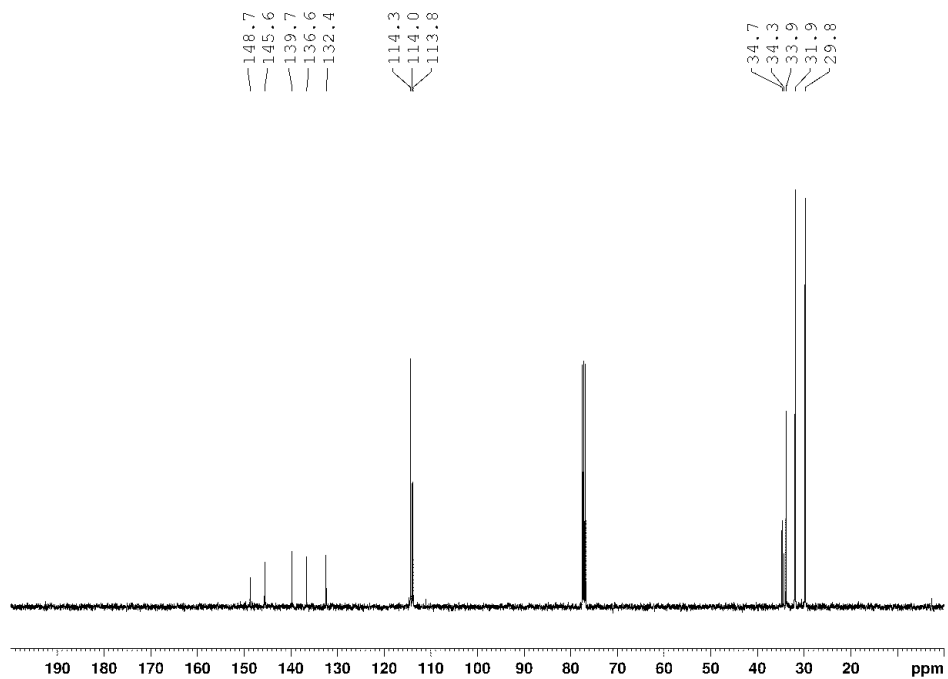

Figure S10. <sup>13</sup>C{<sup>1</sup>H} NMR spectrum of L1'H (75 MHz, CDCl<sub>3</sub>)

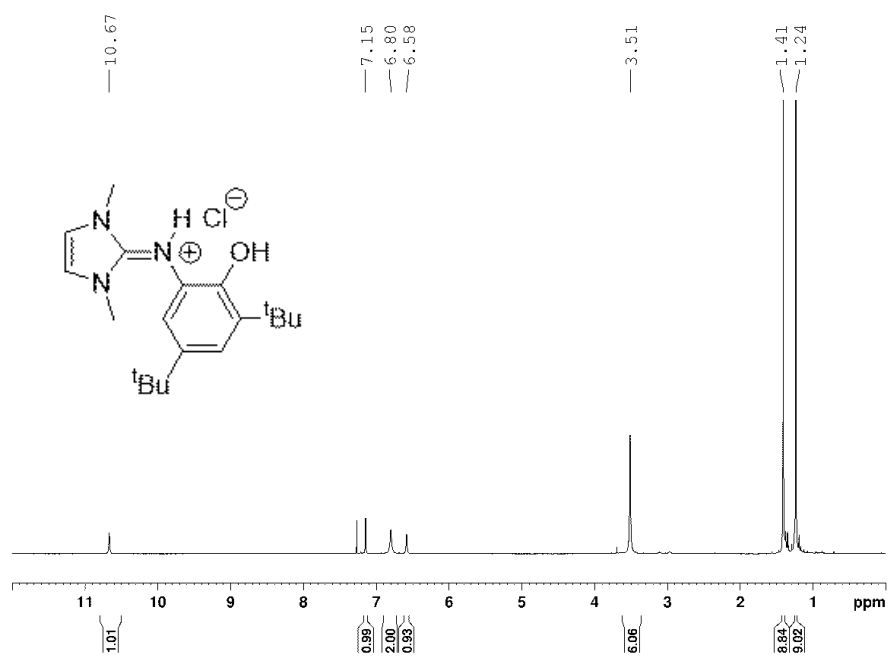

Figure S11. <sup>1</sup>H NMR spectrum of L1'H·HCl (400 MHz, CDCl<sub>3</sub>)

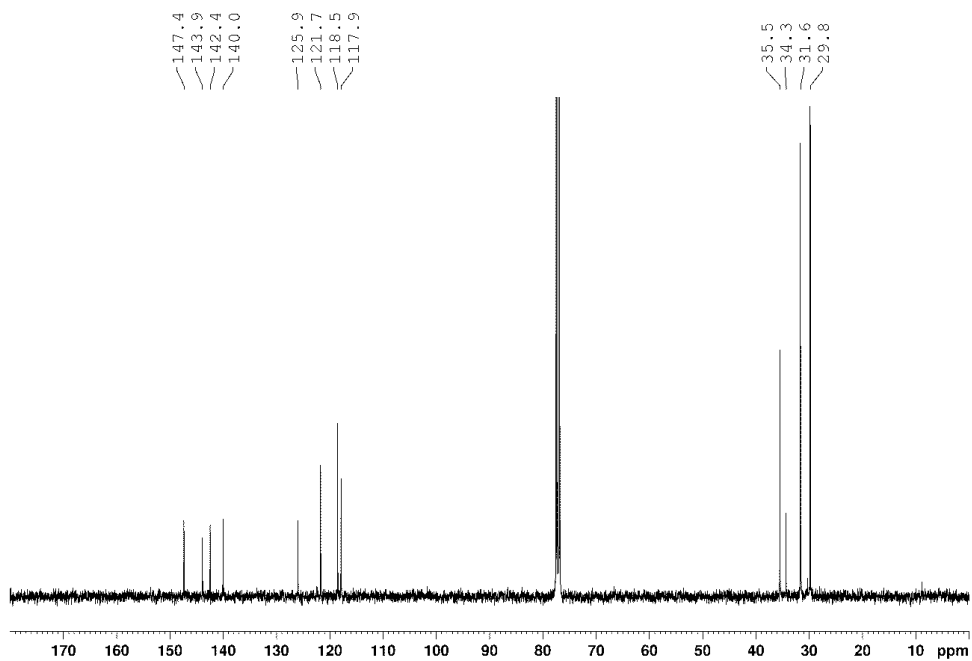

Figure S12. <sup>13</sup>C NMR spectrum of L1'H·HCl (100 MHz, CDCl<sub>3</sub>)

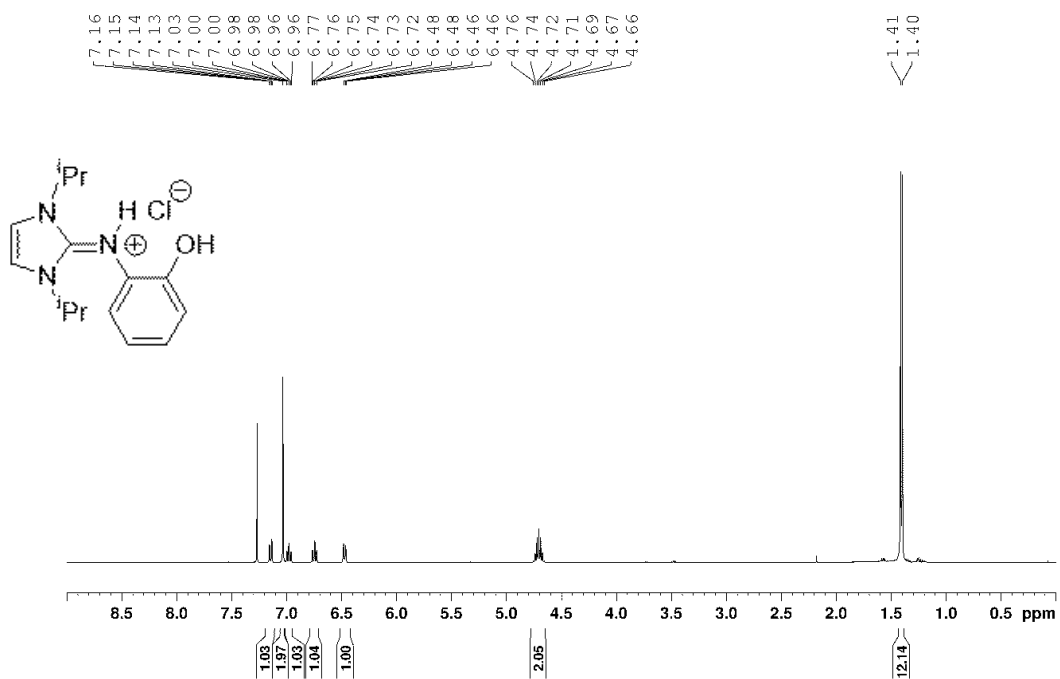

Figure S13.  $^1\text{H}$  NMR spectrum of L2H·HCl (300 MHz,  $\text{CDCl}_3$ )

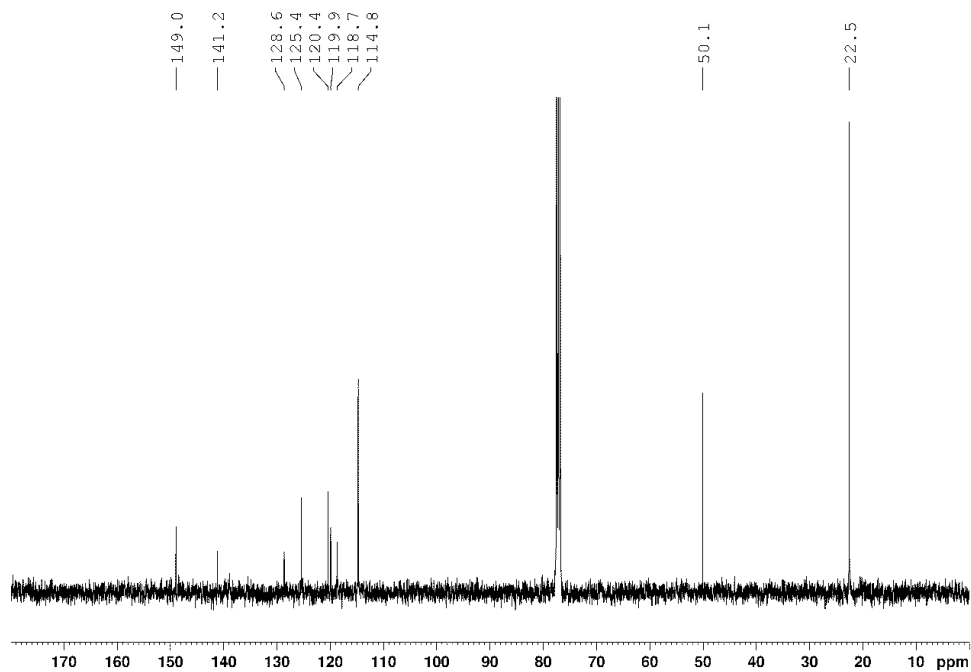

Figure S14.  $^{13}\text{C}\{^1\text{H}\}$  NMR spectrum of L2H·HCl (75 MHz,  $\text{CDCl}_3$ )

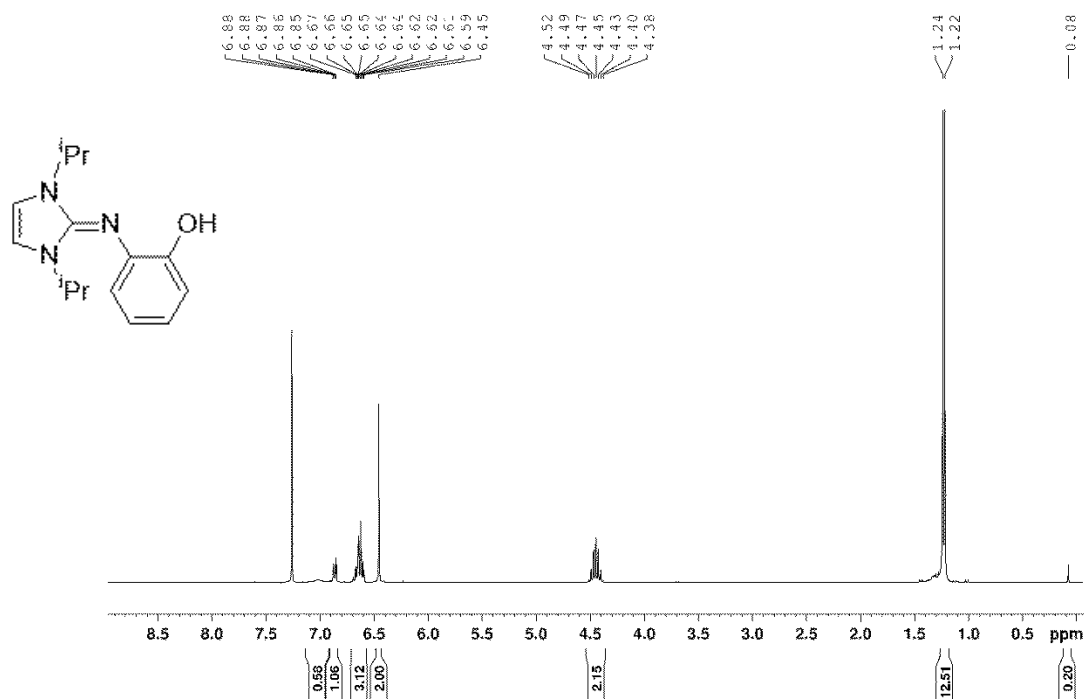

Figure S15. <sup>1</sup>H NMR spectrum of L2H (300 MHz, CDCl<sub>3</sub>)

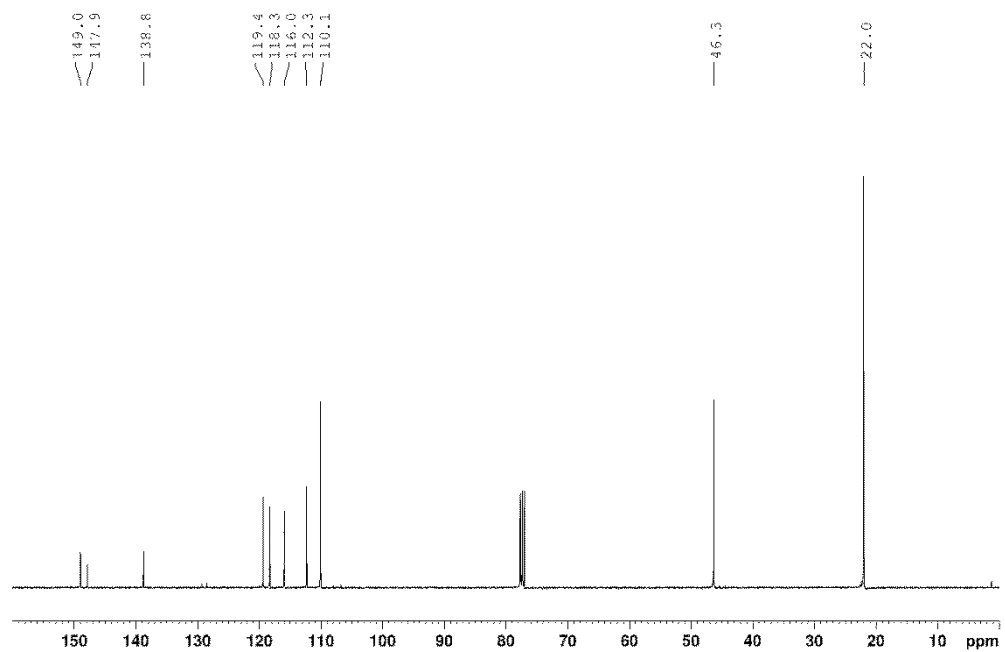

Figure S16. <sup>13</sup>C{<sup>1</sup>H} NMR spectrum of L2H (75 MHz, CDCl<sub>3</sub>)

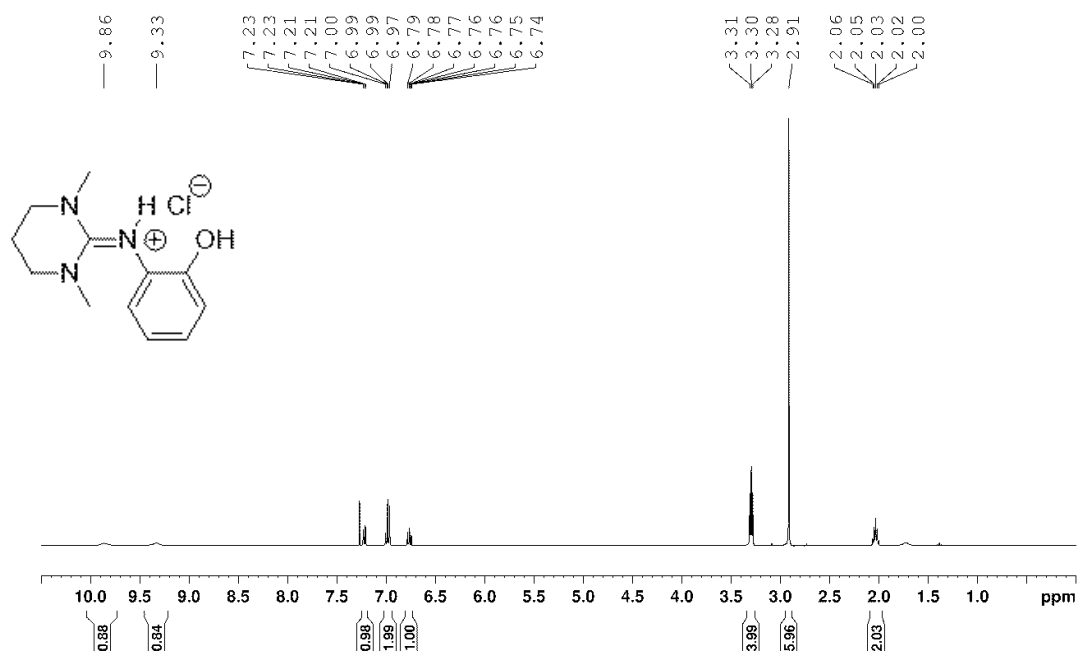

Figure S17. <sup>1</sup>H NMR spectrum of L4H·HCl (400 MHz, CDCl<sub>3</sub>)

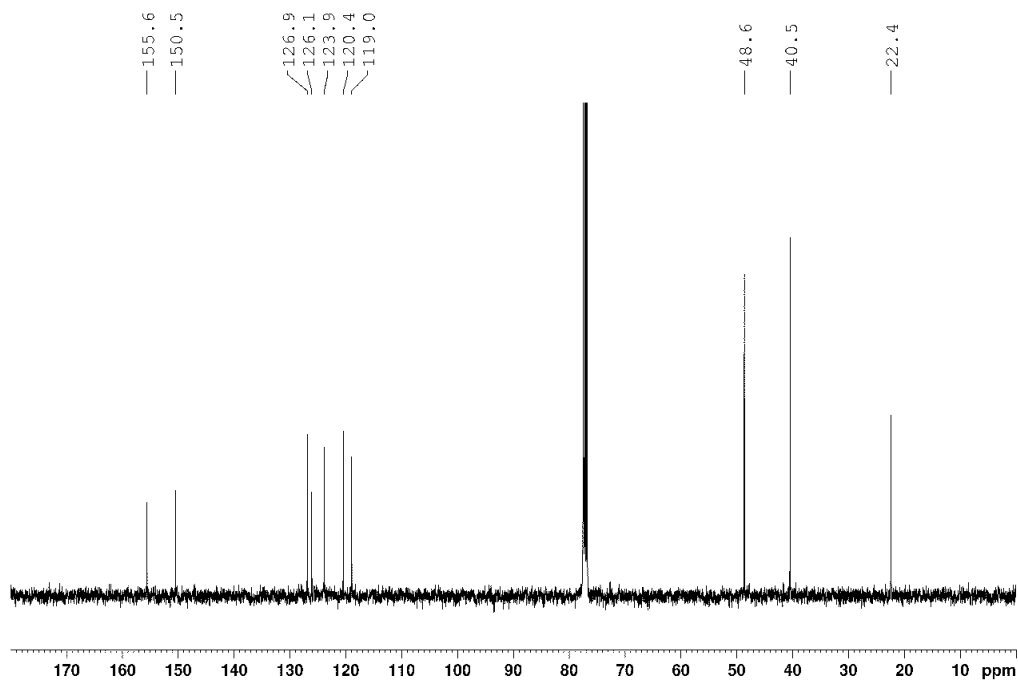

Figure S18. <sup>13</sup>C{<sup>1</sup>H} NMR spectrum of L4H·HCl (100 MHz, CDCl<sub>3</sub>)

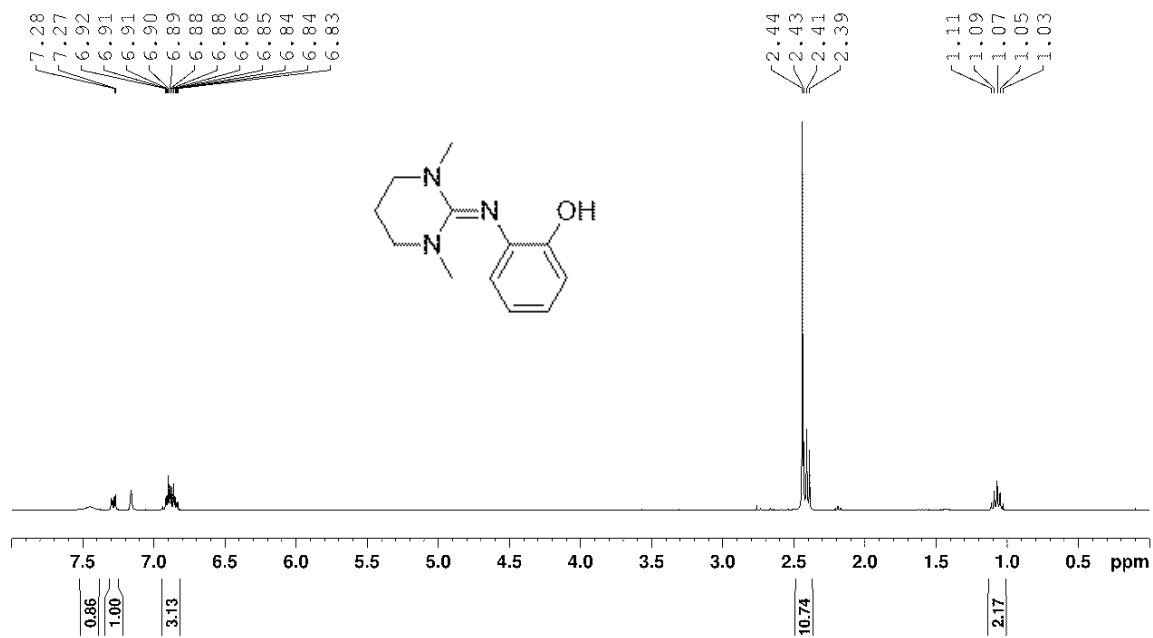

Figure S19. <sup>1</sup>H NMR spectrum of L4H (400 MHz, C<sub>6</sub>D<sub>6</sub>)

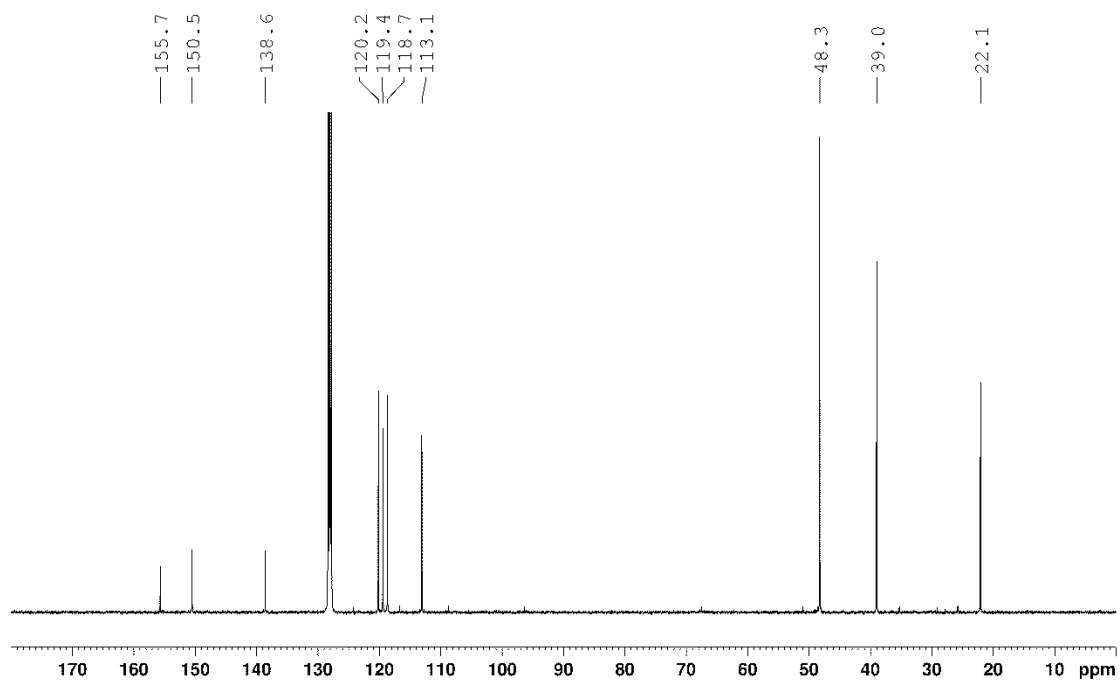

Figure S20. <sup>13</sup>C{<sup>1</sup>H} NMR spectrum of L4H (100 MHz, C<sub>6</sub>D<sub>6</sub>)

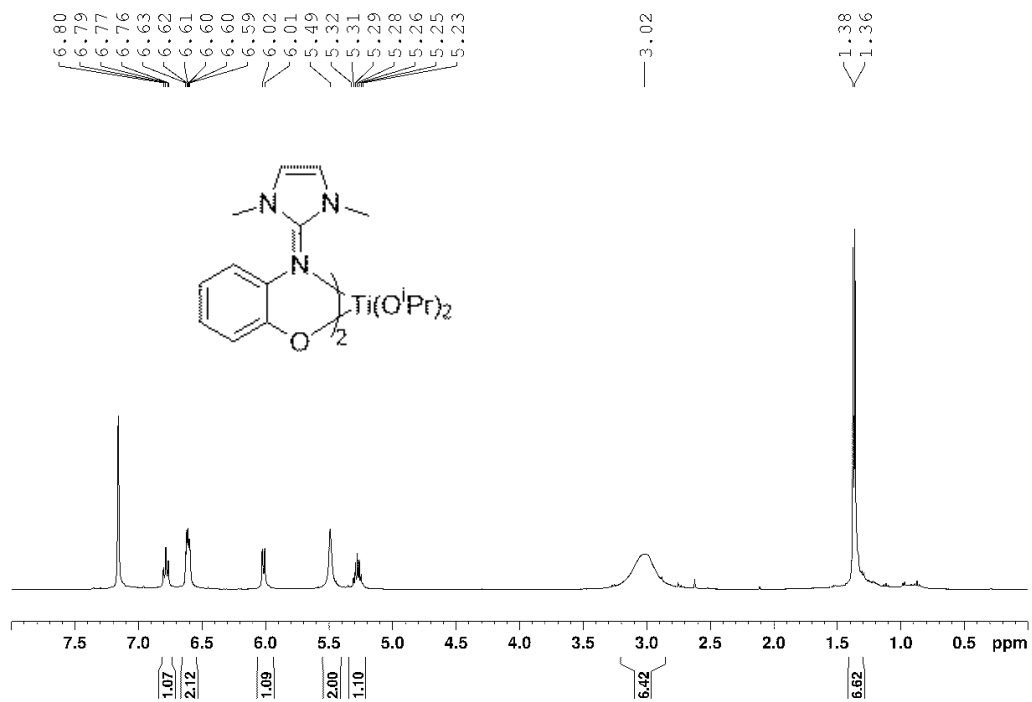

Figure S21. <sup>1</sup>H NMR spectrum of Ti1a (400 MHz, C<sub>6</sub>D<sub>6</sub>)

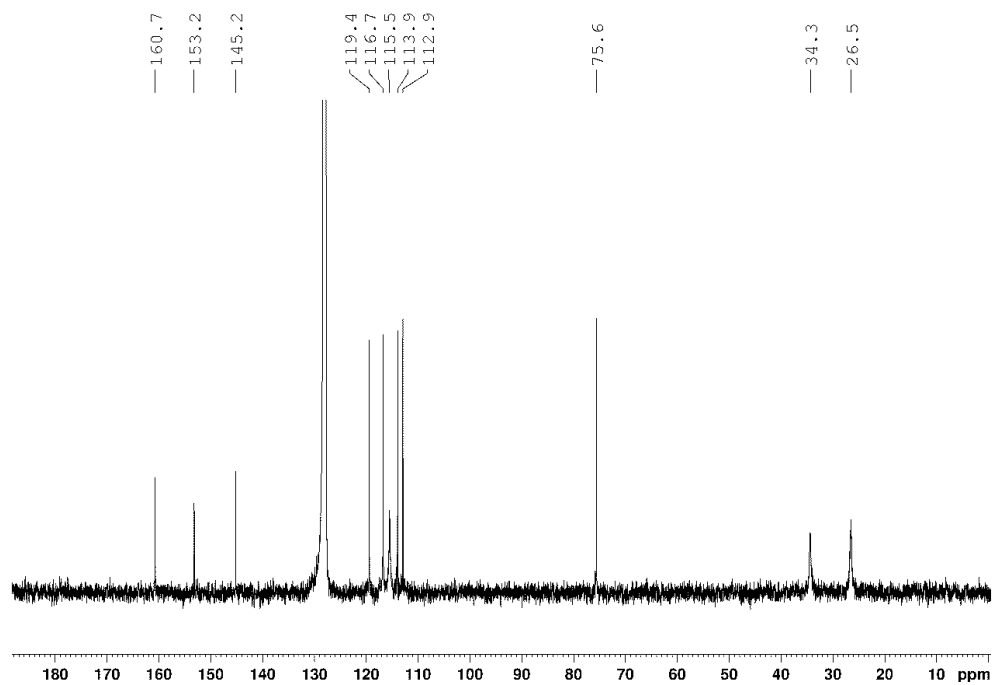

Figure S22. <sup>13</sup>C{<sup>1</sup>H} NMR spectrum of Ti1a (100 MHz, C<sub>6</sub>D<sub>6</sub>)

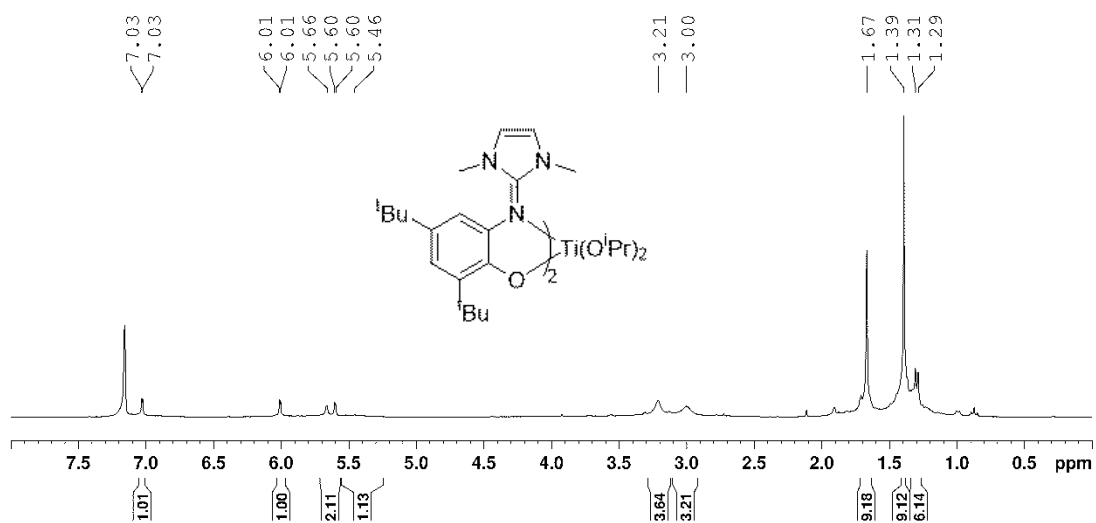

Figure S23.  $^1\text{H}$  NMR spectrum of Ti1'a (400 MHz,  $\text{C}_6\text{D}_6$ )

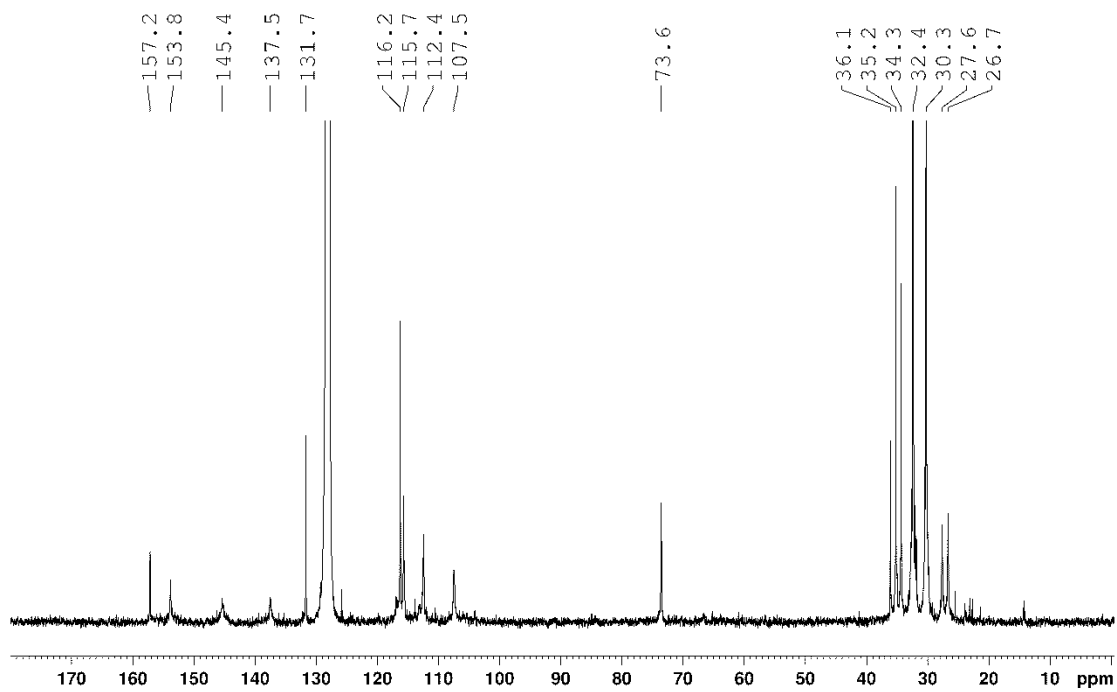

Figure S24.  $^{13}\text{C}\{^1\text{H}\}$  NMR spectrum of Ti1'a (100 MHz,  $\text{C}_6\text{D}_6$ )



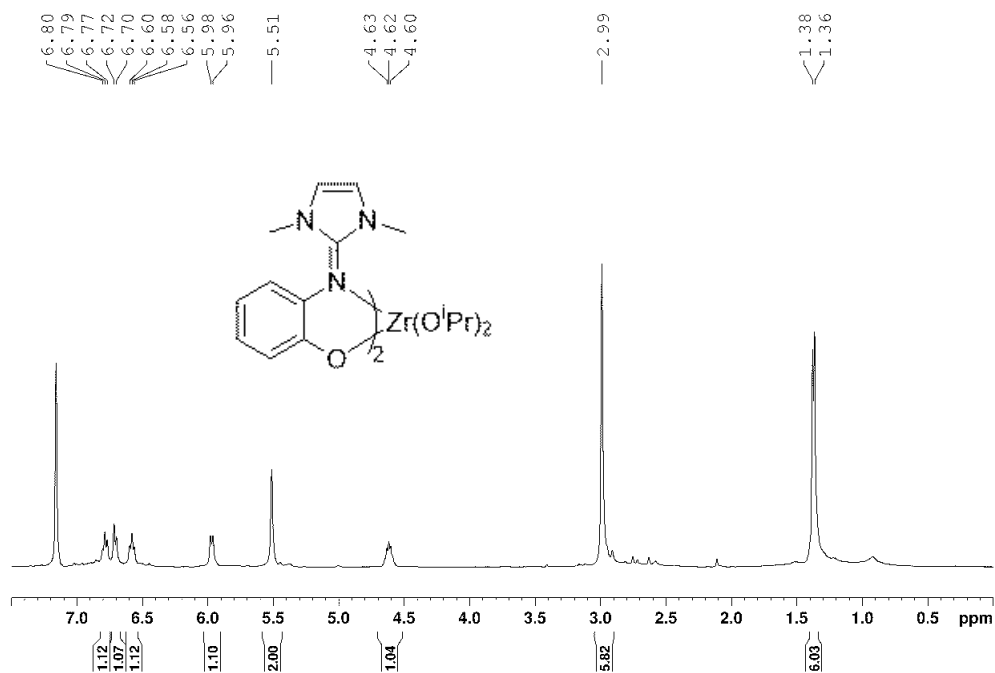

Figure S25.  $^1\text{H}$  NMR spectrum of Zr1a (400 MHz,  $\text{C}_6\text{D}_6$ )

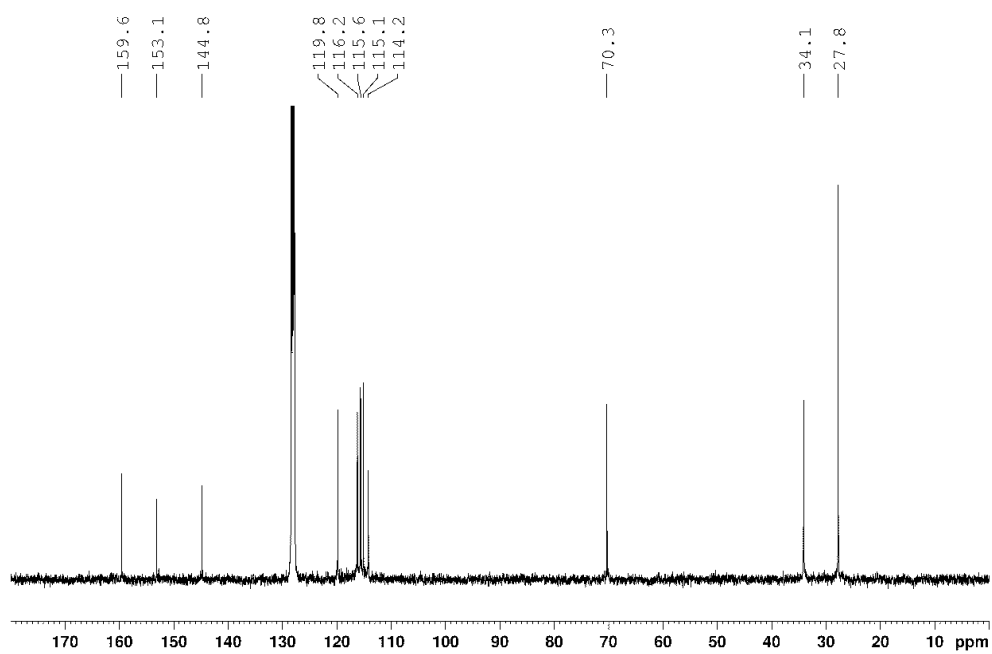

Figure S26.  $^{13}\text{C}\{^1\text{H}\}$  NMR spectrum of Zr1a (100 MHz,  $\text{C}_6\text{D}_6$ )

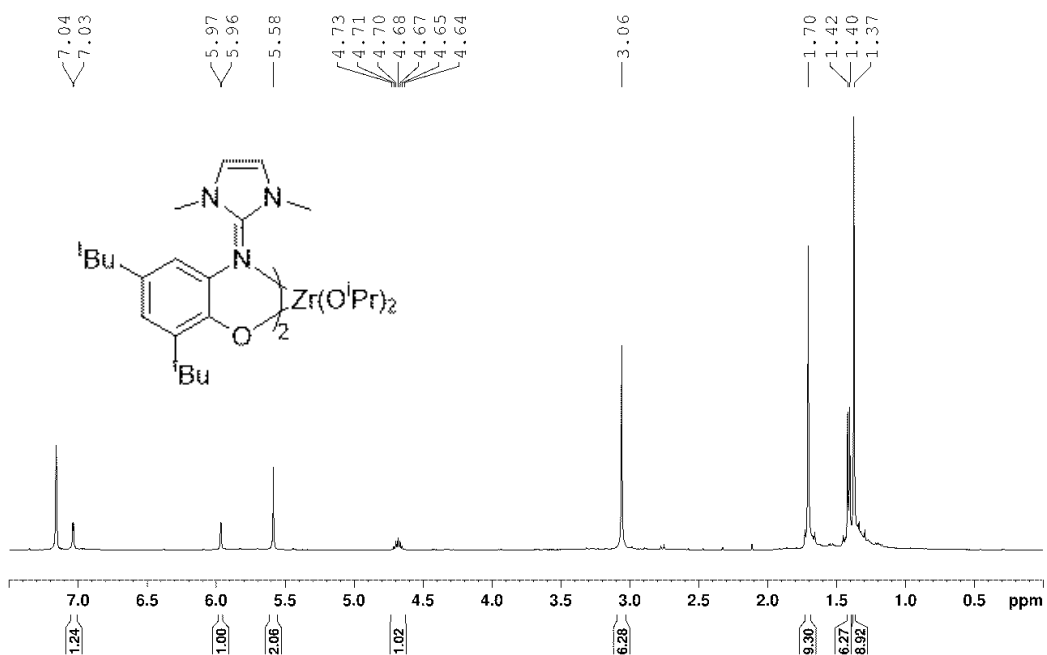

Figure S27. <sup>1</sup>H NMR spectrum of Zr1'a (400 MHz, C<sub>6</sub>D<sub>6</sub>)

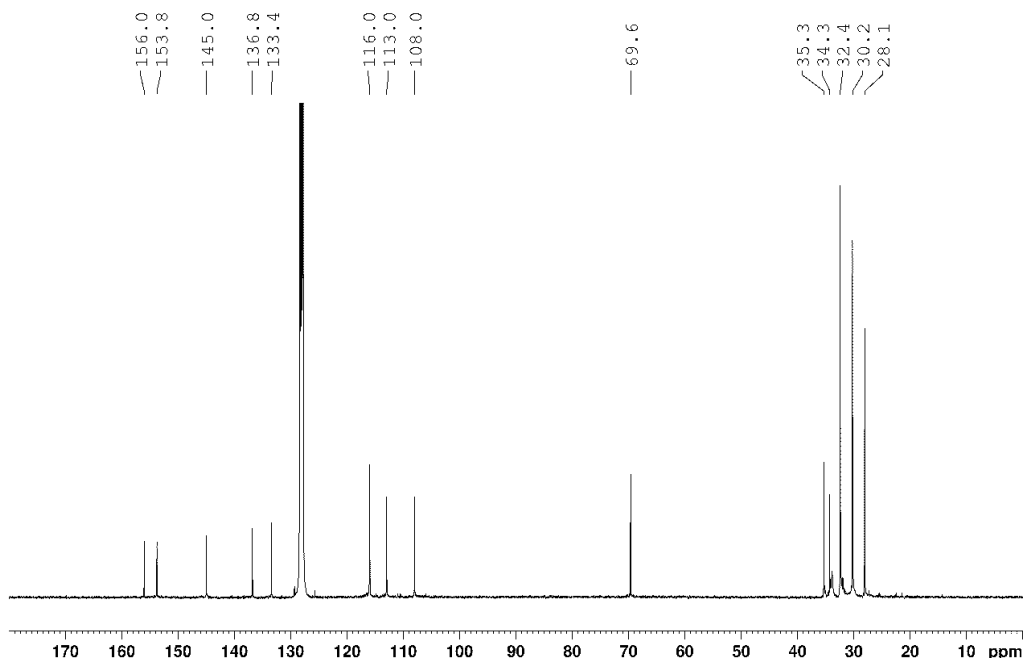

Figure S28. <sup>13</sup>C{<sup>1</sup>H} NMR spectrum of Zr1'a (100 MHz, C<sub>6</sub>D<sub>6</sub>)

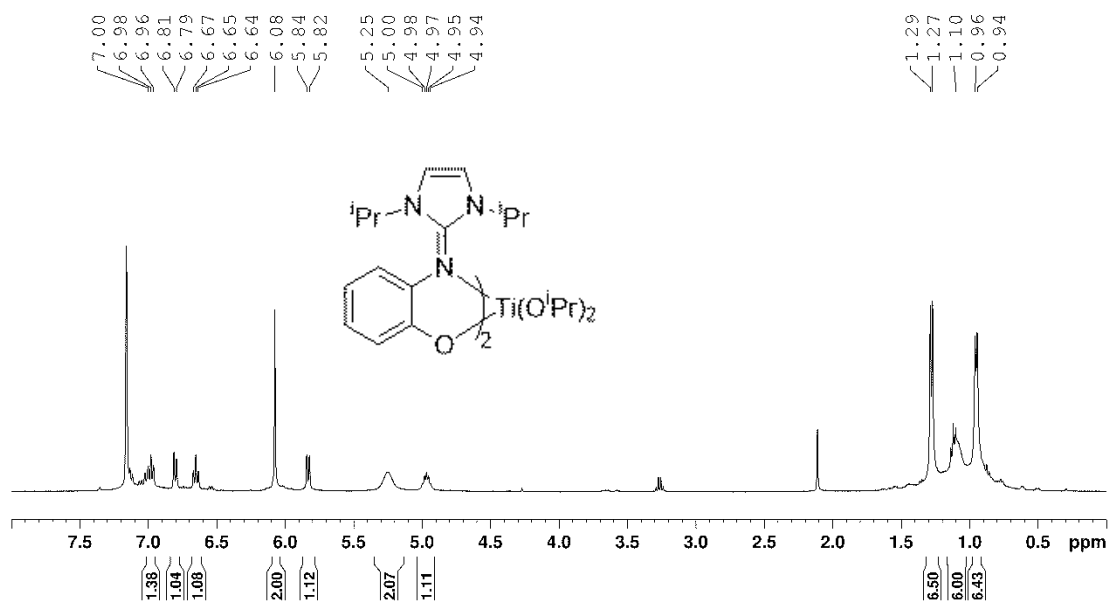

Figure S29. <sup>1</sup>H NMR spectrum of Ti2a (400 MHz, C<sub>6</sub>D<sub>6</sub>)

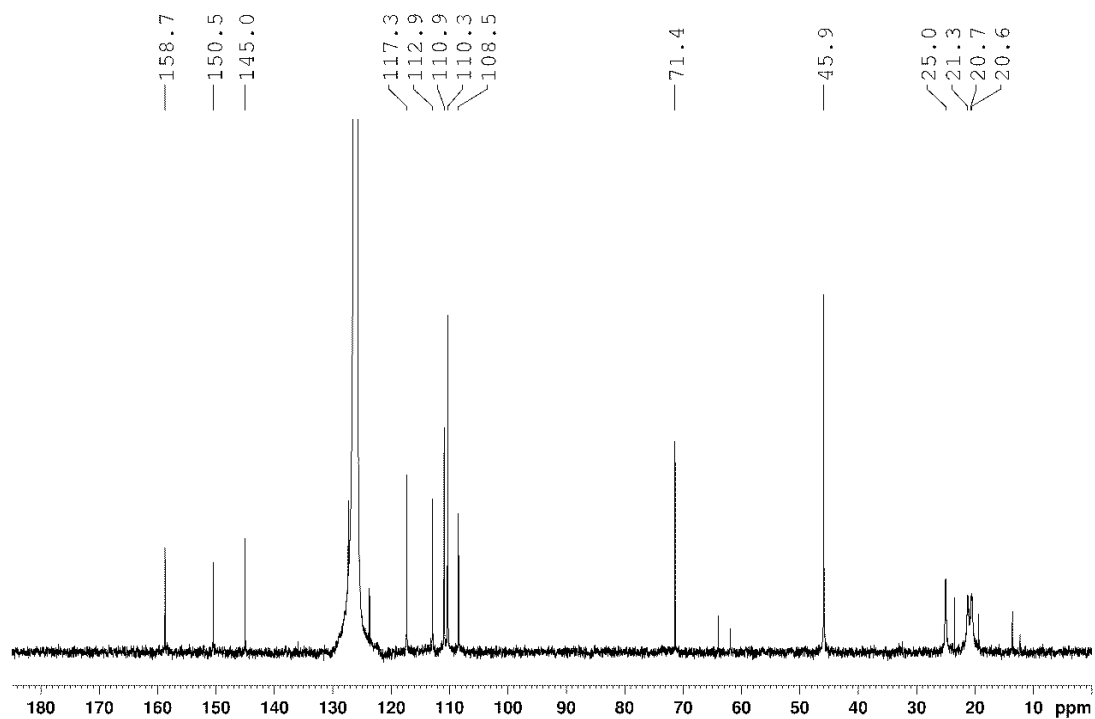

Figure S30. <sup>13</sup>C{<sup>1</sup>H} NMR spectrum of Ti2a (75 MHz, CDCl<sub>3</sub>)

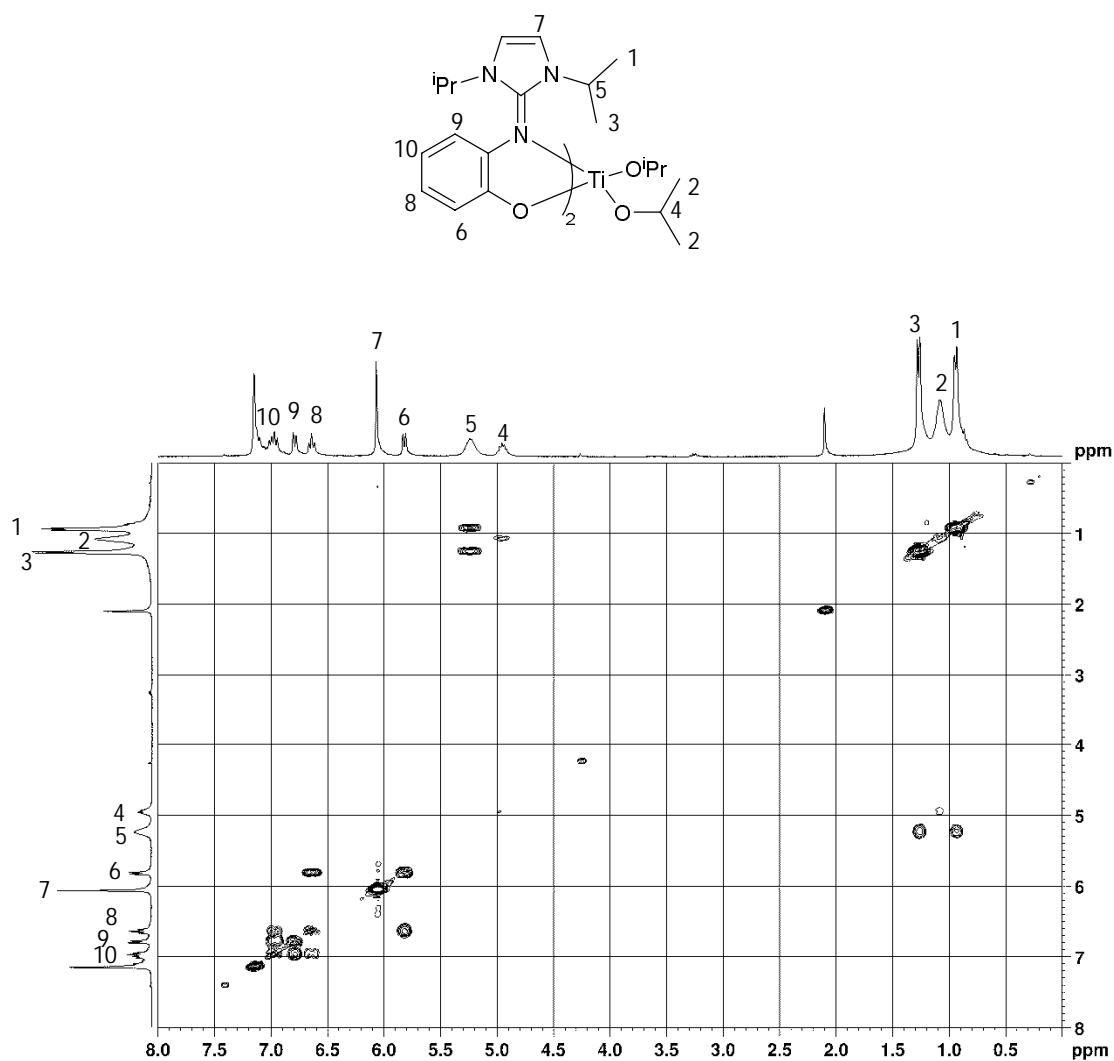

Figure S31.  $^1\text{H}$ - $^1\text{H}$  COSY spectrum of Ti2a (400 MHz,  $\text{C}_6\text{D}_6$ )

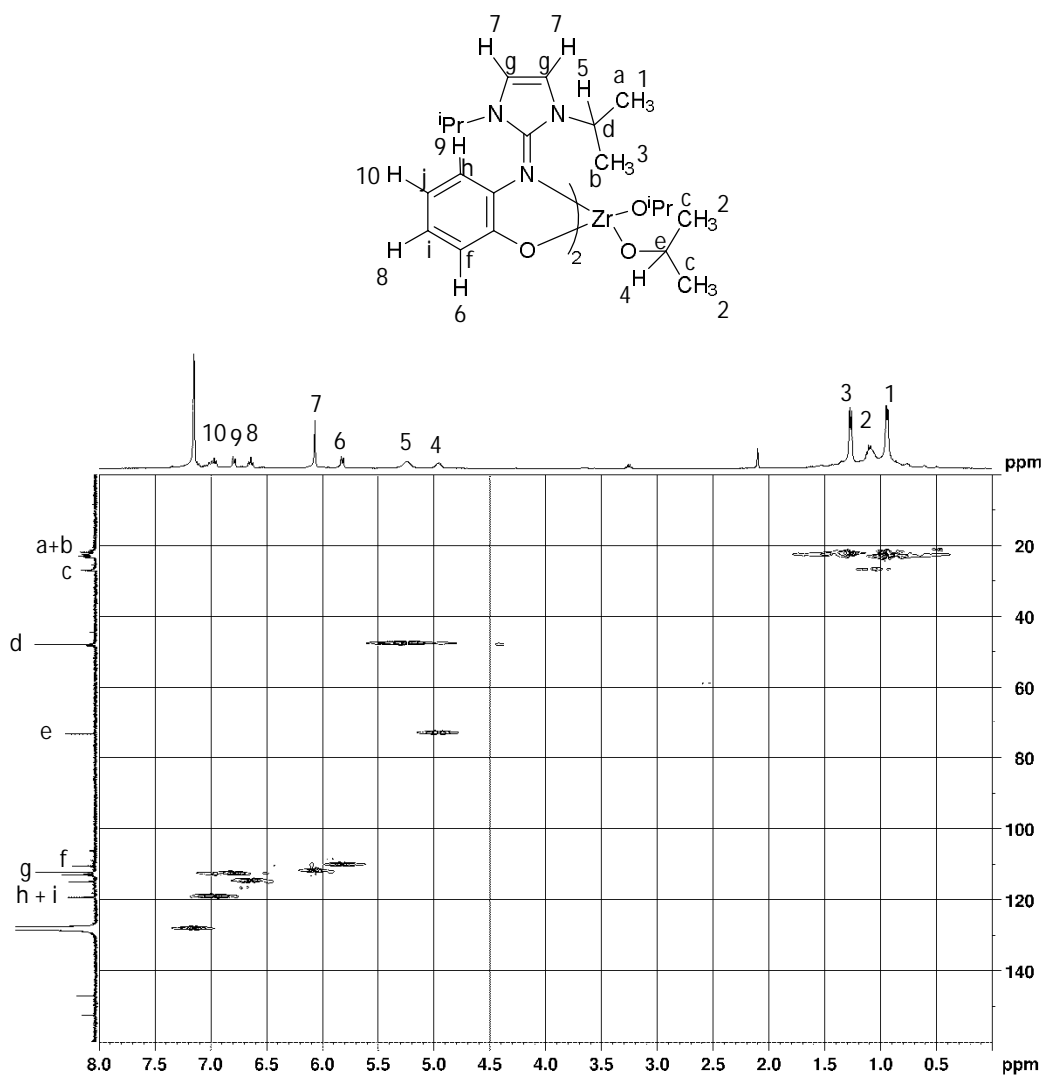

Figure S32.  $^1\text{H}$ - $^{13}\text{C}$  HSQC spectrum of Ti2a (400 MHz,  $\text{C}_6\text{D}_6$ )



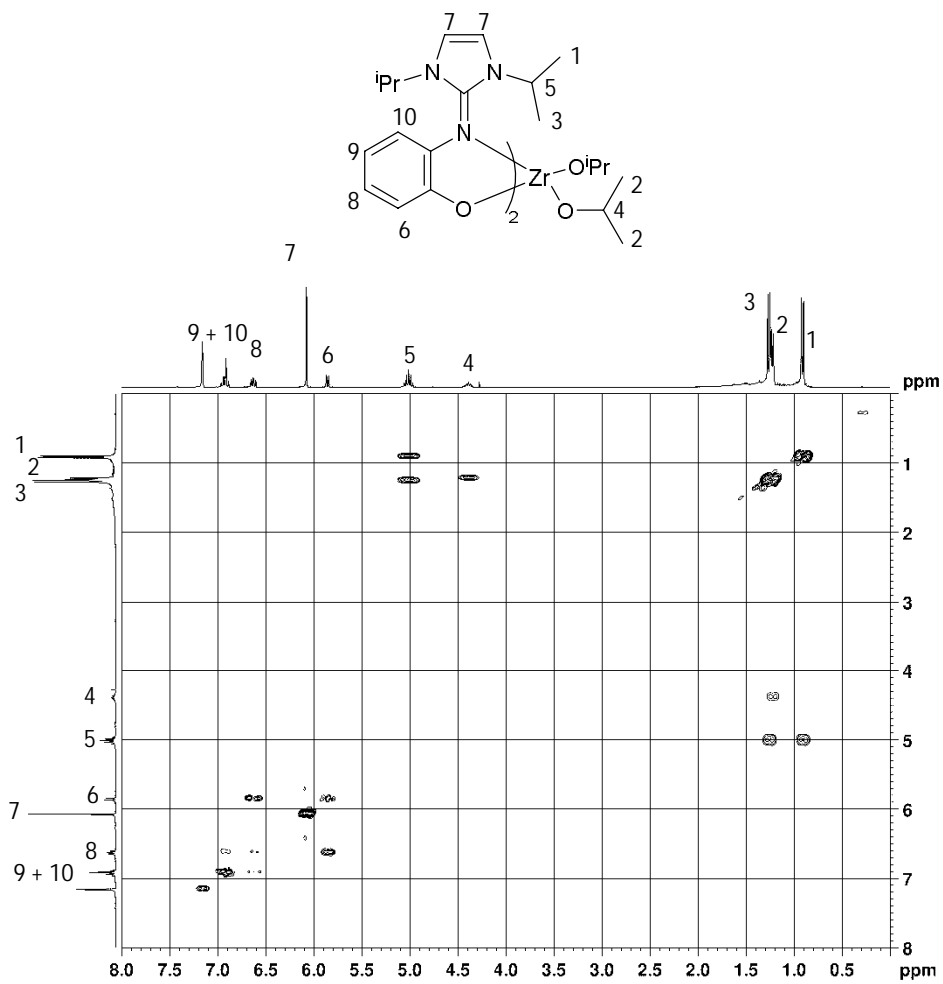

Figure S35.  $^1\text{H}$ - $^1\text{H}$  COSY spectrum of Zr2a (400 MHz,  $\text{C}_6\text{D}_6$ )

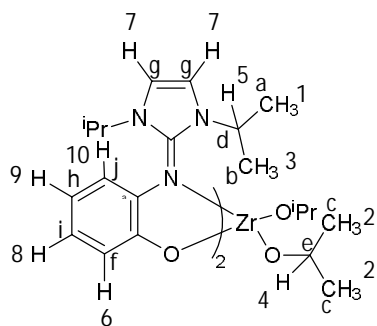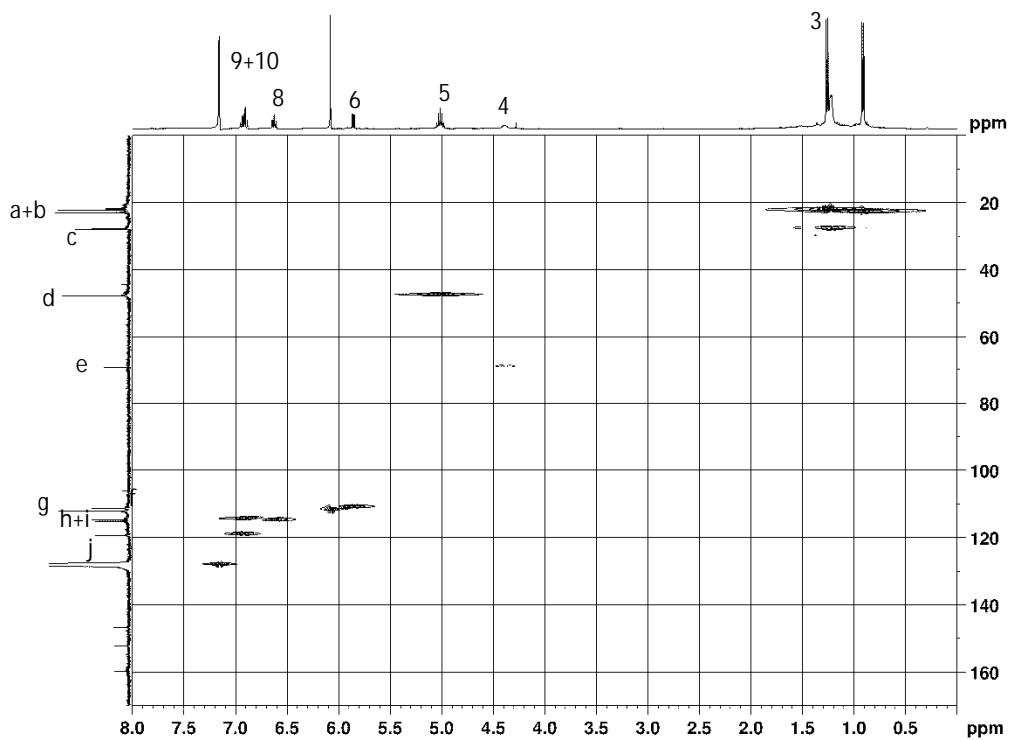

Figure S36.  $^1\text{H}$ - $^{13}\text{C}$  HSQC spectrum of Zr2a (400 MHz,  $\text{C}_6\text{D}_6$ )



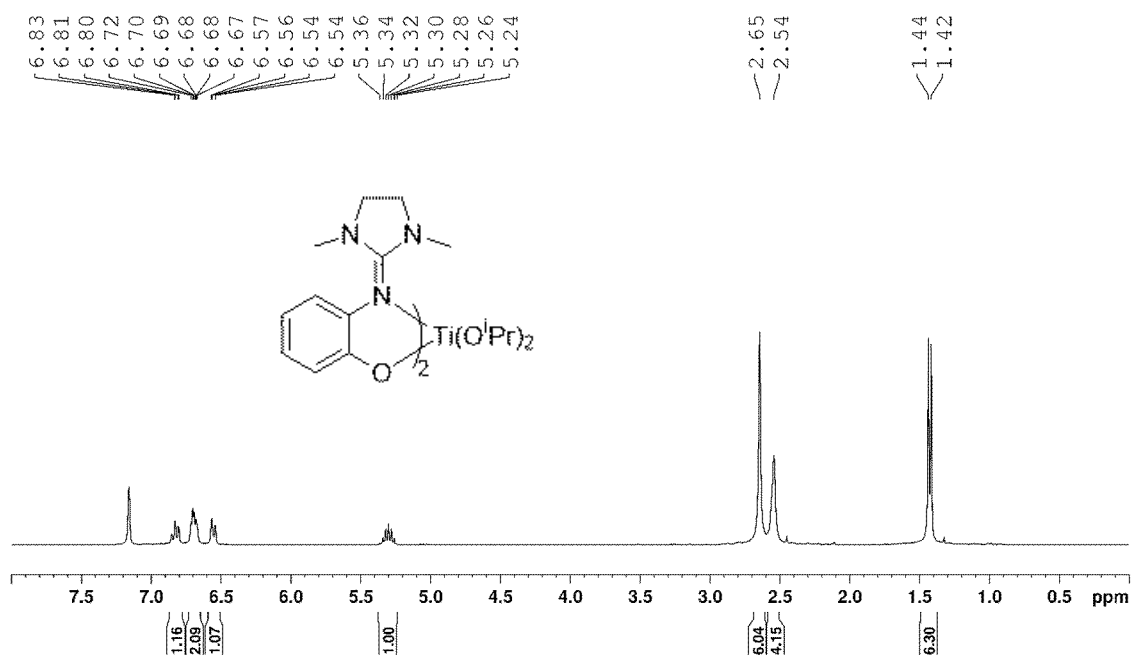

Figure S37. <sup>1</sup>H NMR spectrum of Ti3a (300 MHz, C<sub>6</sub>D<sub>6</sub>)

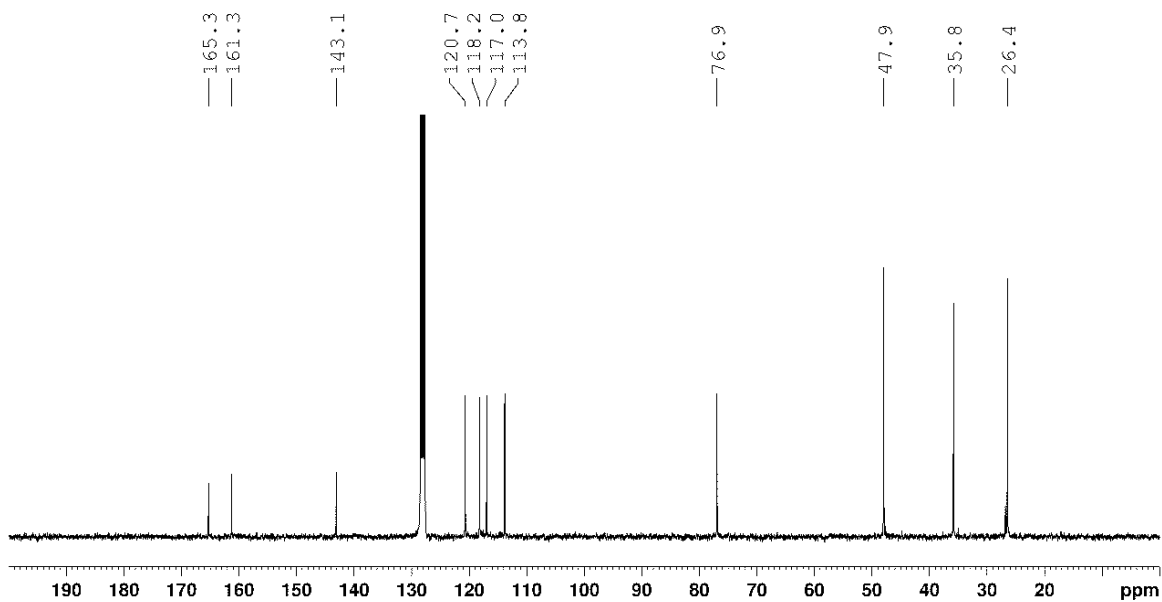

Figure S38. <sup>13</sup>C{<sup>1</sup>H} NMR spectrum of Ti3a (75 MHz, C<sub>6</sub>D<sub>6</sub>)

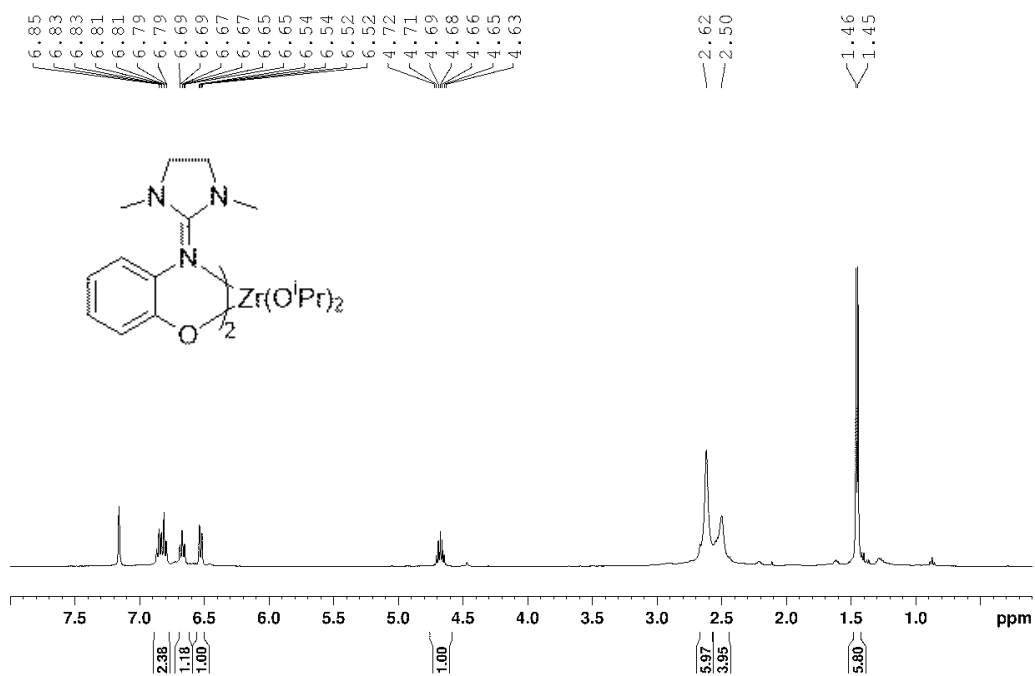

Figure S39. <sup>1</sup>H NMR spectrum of Zr3a (400 MHz, C<sub>6</sub>D<sub>6</sub>)

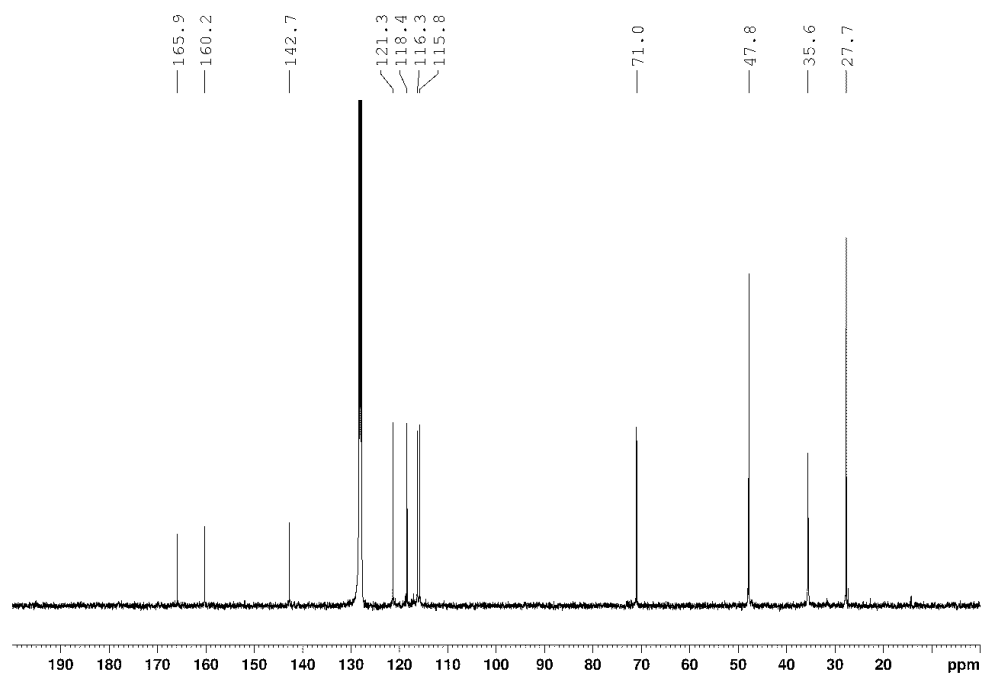

Figure S40. <sup>13</sup>C{<sup>1</sup>H} NMR spectrum of Zr3a (100 MHz, C<sub>6</sub>D<sub>6</sub>)

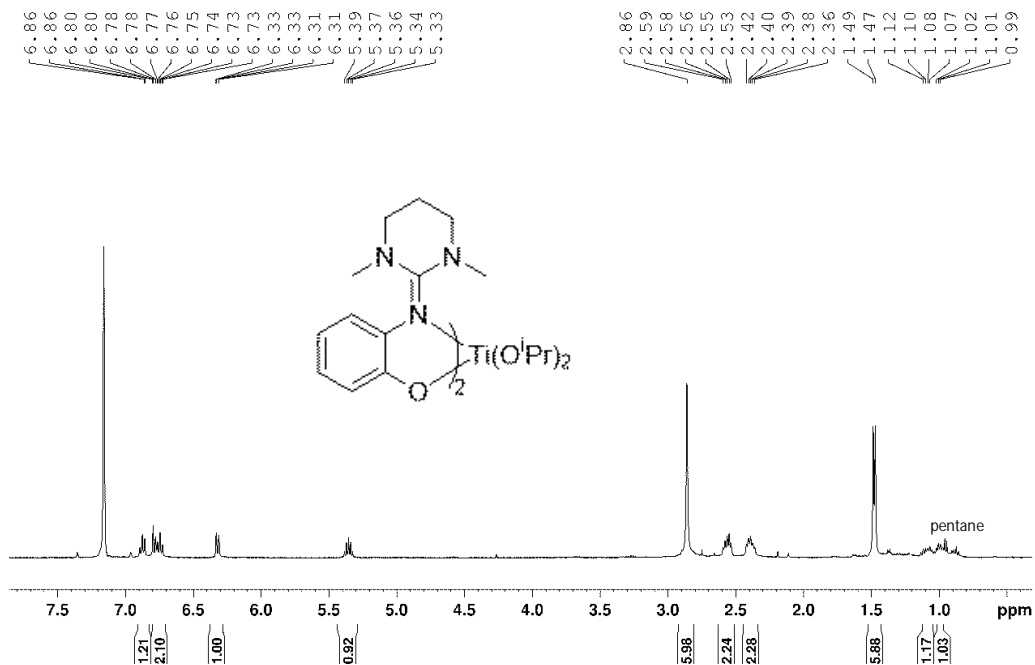

Figure S41. <sup>1</sup>H NMR spectrum of Ti4a (300 MHz, C<sub>6</sub>D<sub>6</sub>)

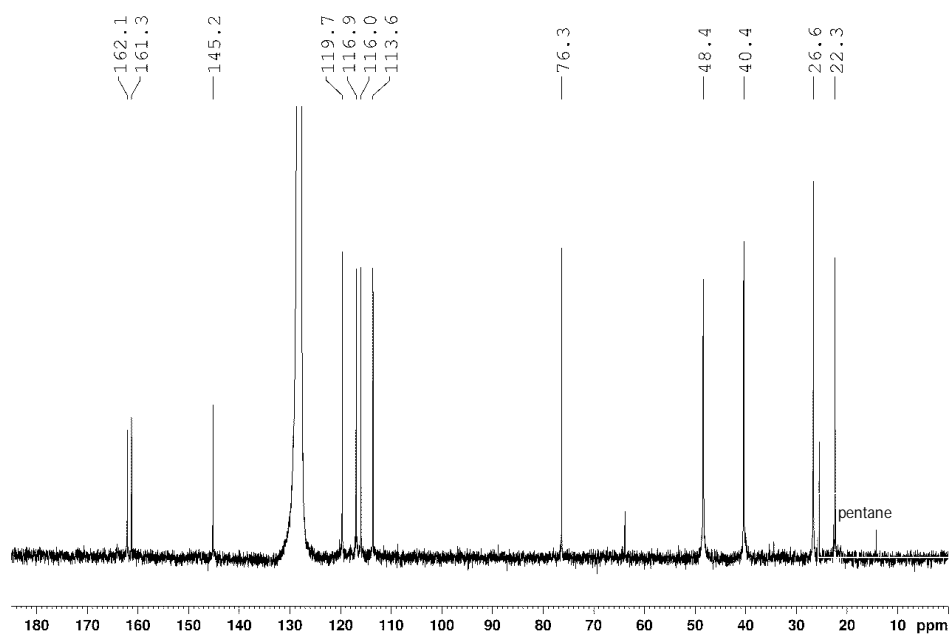

Figure S42. <sup>13</sup>C{<sup>1</sup>H} NMR spectrum of Ti4a (75 MHz, C<sub>6</sub>D<sub>6</sub>)

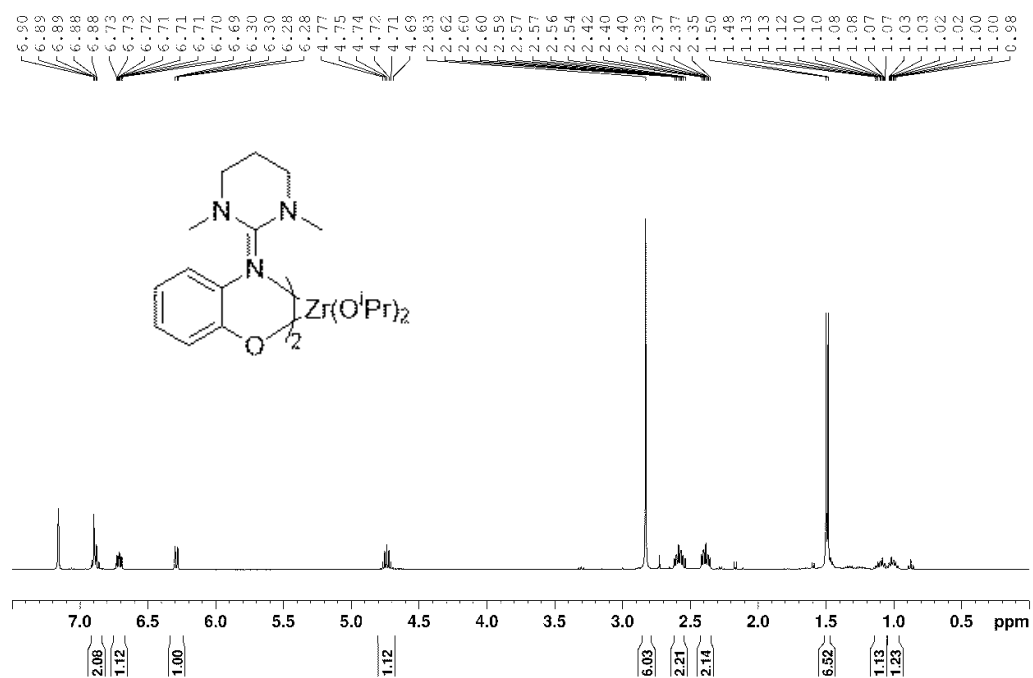

Figure S43. <sup>1</sup>H NMR spectrum of Zr4a (400 MHz, C<sub>6</sub>D<sub>6</sub>)

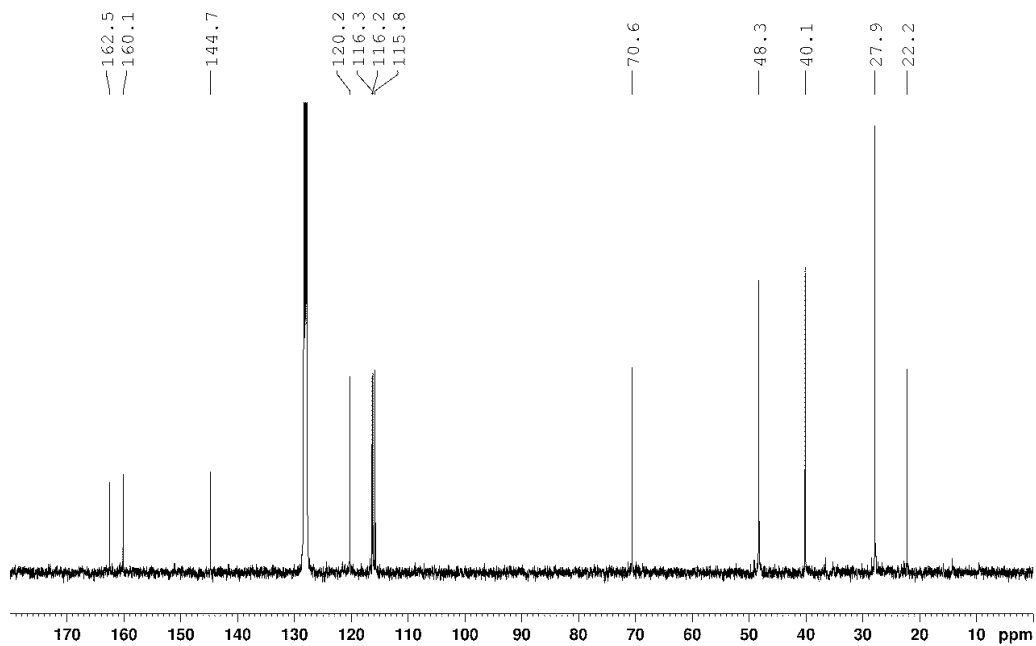

Figure S44. <sup>13</sup>C{<sup>1</sup>H} NMR spectrum of Zr4a (100 MHz, C<sub>6</sub>D<sub>6</sub>)

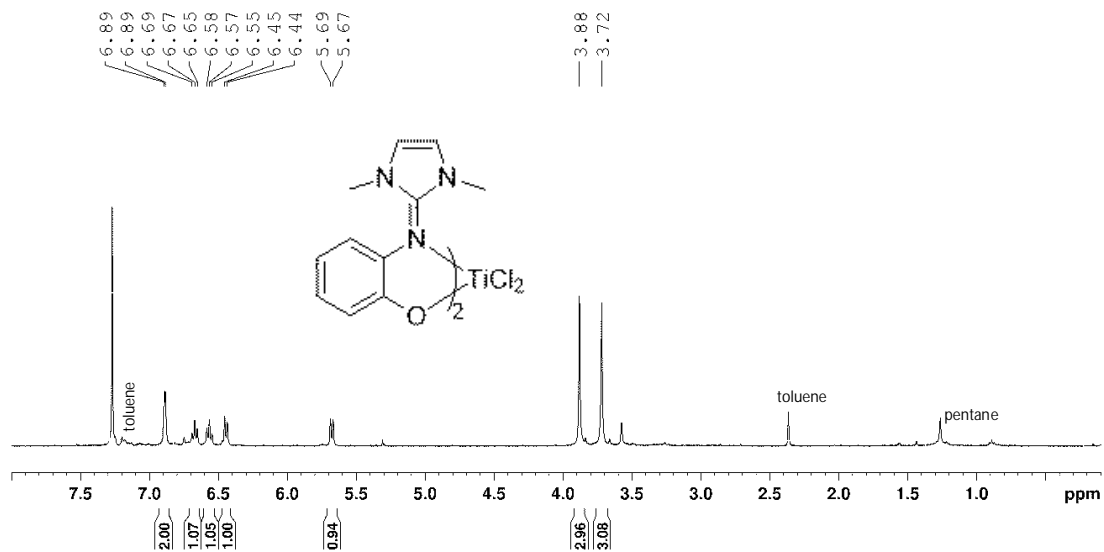

Figure S45. <sup>1</sup>H NMR spectrum of Ti1b (400 MHz, C<sub>6</sub>D<sub>6</sub>)

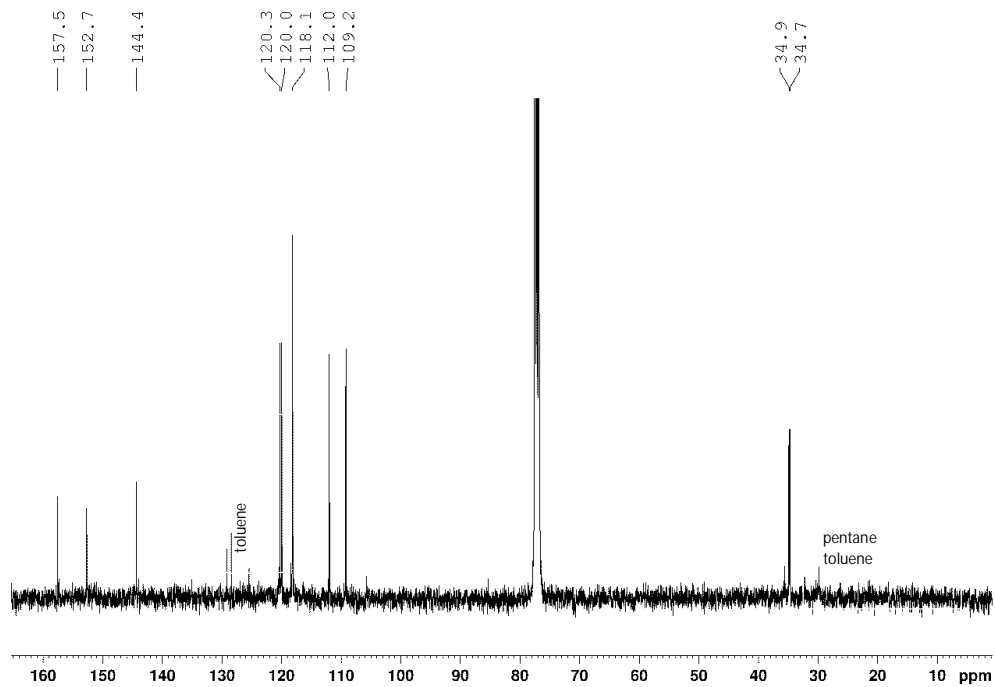

Figure S46. <sup>13</sup>C{<sup>1</sup>H} NMR spectrum of Ti1b (100 MHz, C<sub>6</sub>D<sub>6</sub>)

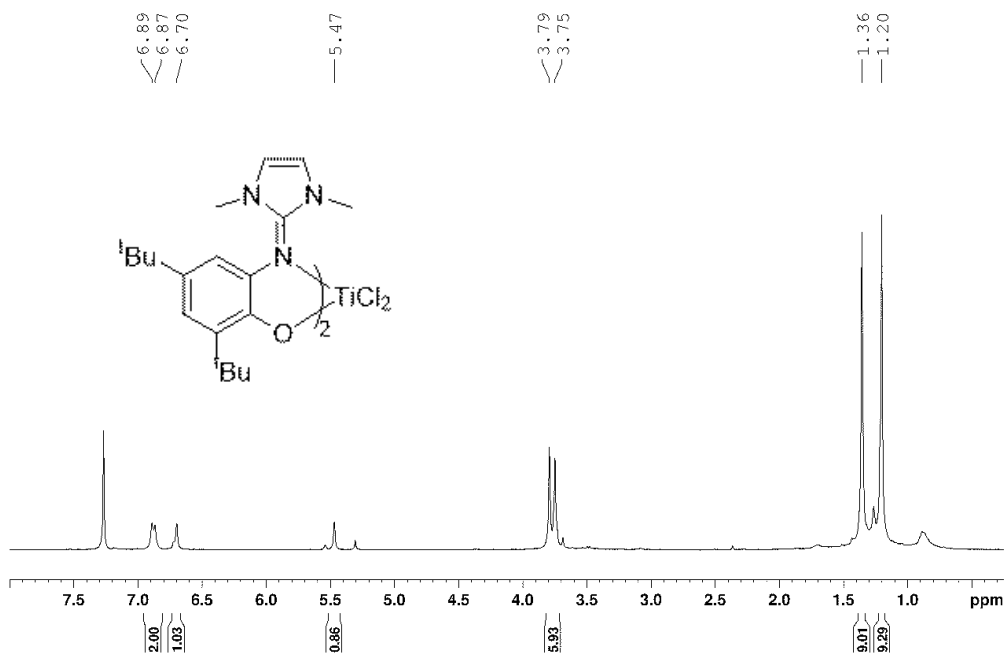

Figure S47. <sup>1</sup>H NMR spectrum of Ti1'b (400 MHz, CDCl<sub>3</sub>)

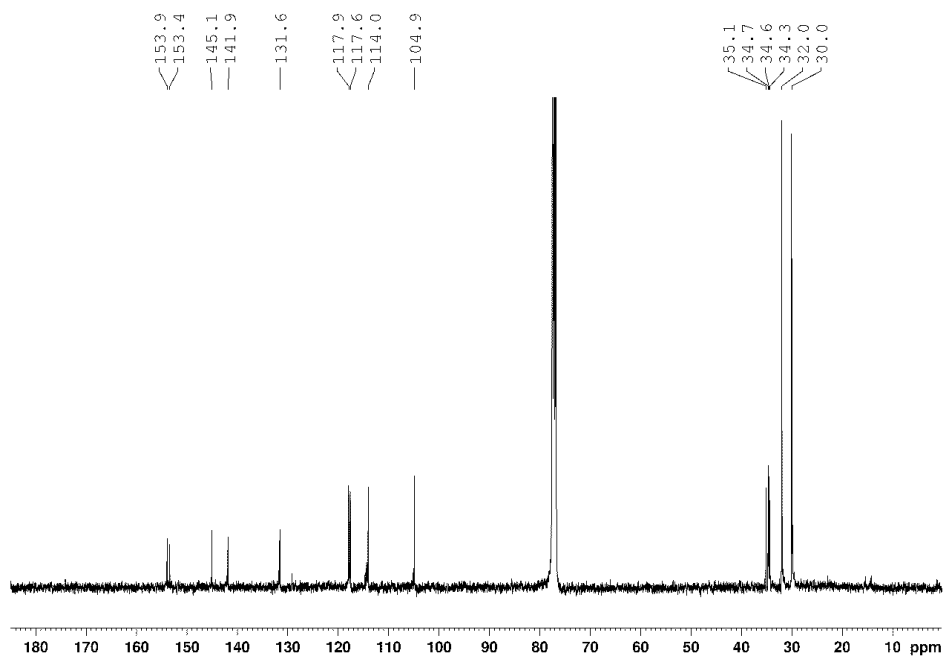

Figure S48. <sup>13</sup>C{<sup>1</sup>H} NMR spectrum of Ti1'b (100 MHz, CDCl<sub>3</sub>)

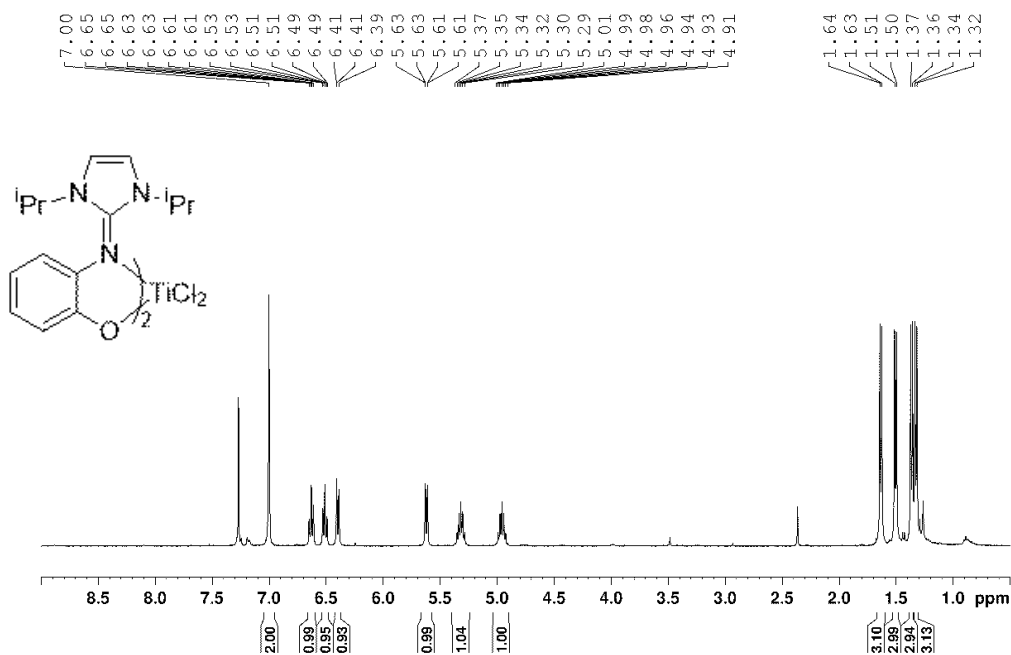

Figure S49. <sup>1</sup>H NMR spectrum of Ti2b (400 MHz, CDCl<sub>3</sub>)

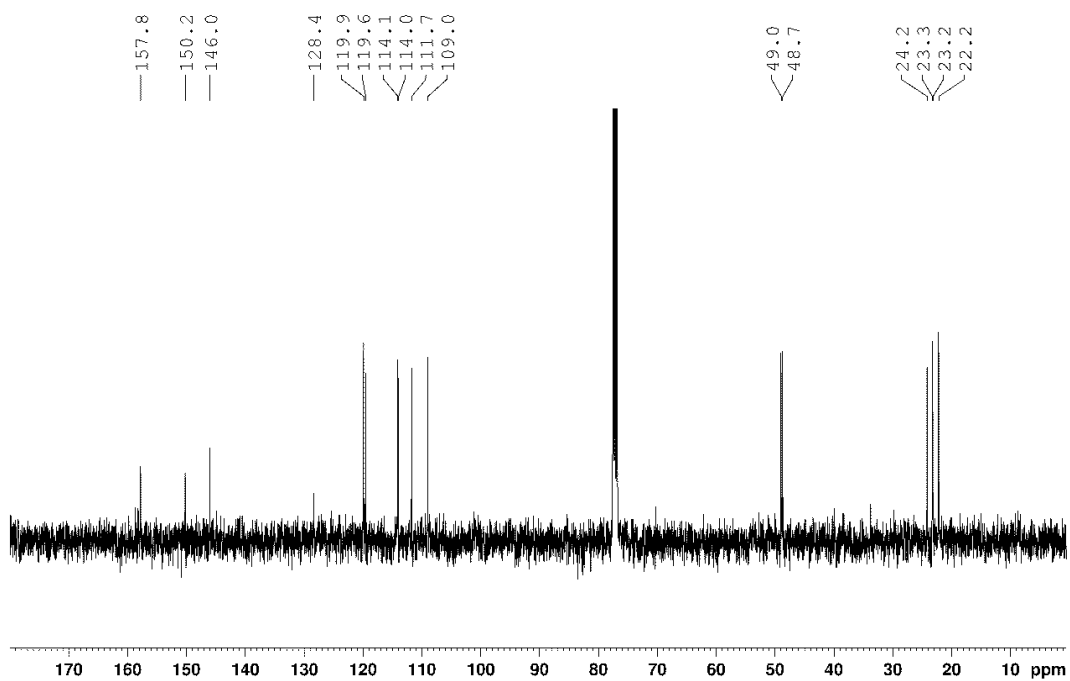

Figure S50. <sup>13</sup>C{<sup>1</sup>H} NMR spectrum of Ti2b (100 MHz, CDCl<sub>3</sub>)





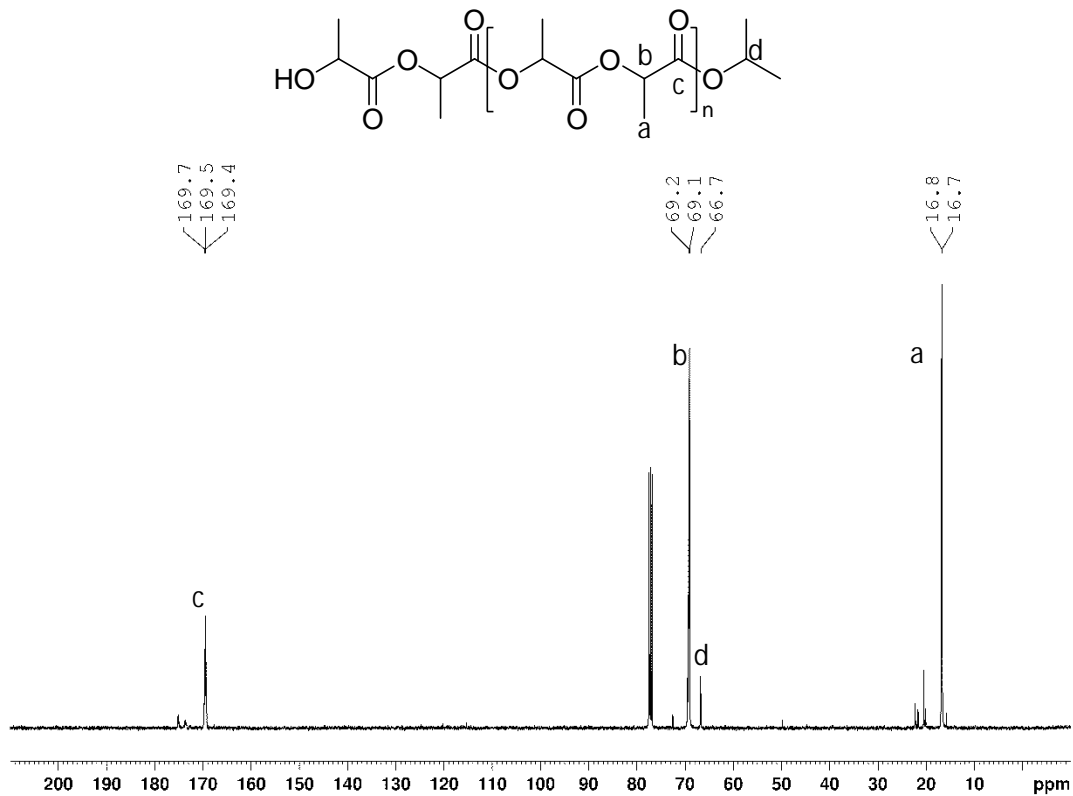

Figure S53.  $^{13}\text{C}$   $\{^1\text{H}\}$  spectrum of the polymer produced with Zr2a (100 MHz,  $\text{CDCl}_3$ )

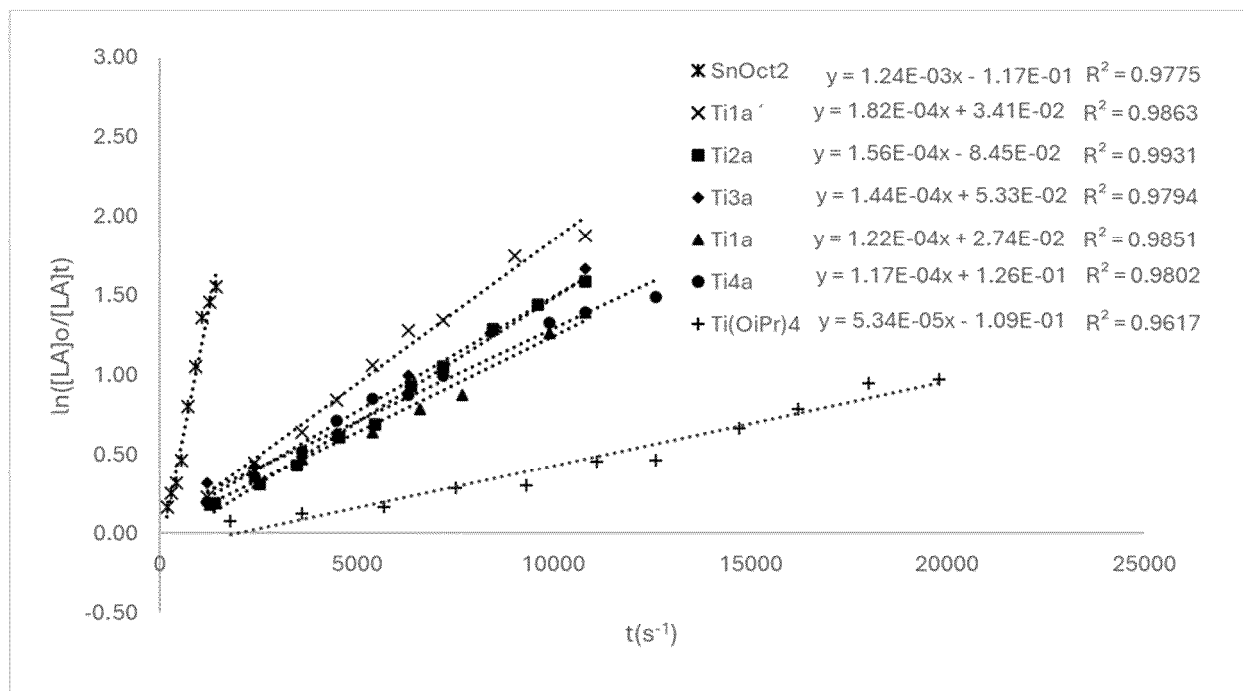

Figure S54. Kinetic plot for the polymerization of rac-lactide by  $\text{Sn}(\text{Oct})_2$ ,  $\text{Ti}(\text{OiPr})_4$ , Ti1a, Ti1'a, Ti2a, Ti3a, and Ti4a.

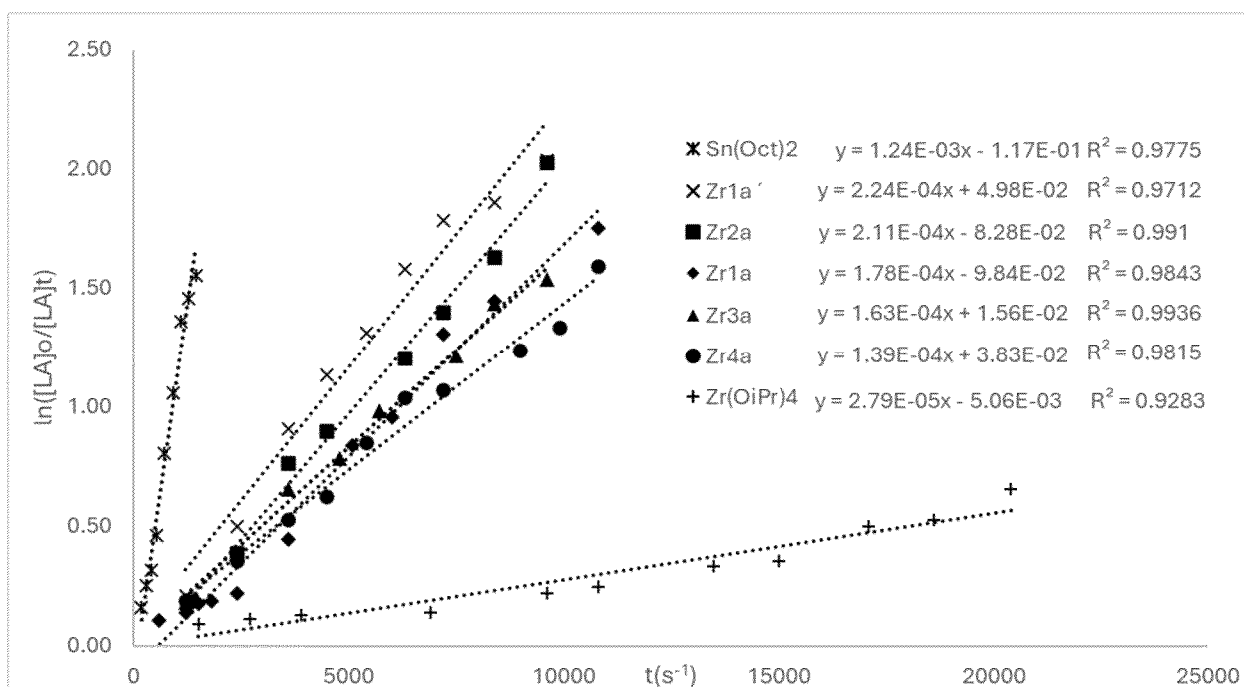

Figure S55. Kinetic plot for the polymerization of *rac*-lactide by Sn(Oct)<sub>2</sub>, Zr(OiPr)<sub>4</sub>, <sup>i</sup>PrOH, Zr1a, Zr1'a, Zr2a, Zr3a, and Zr4a.

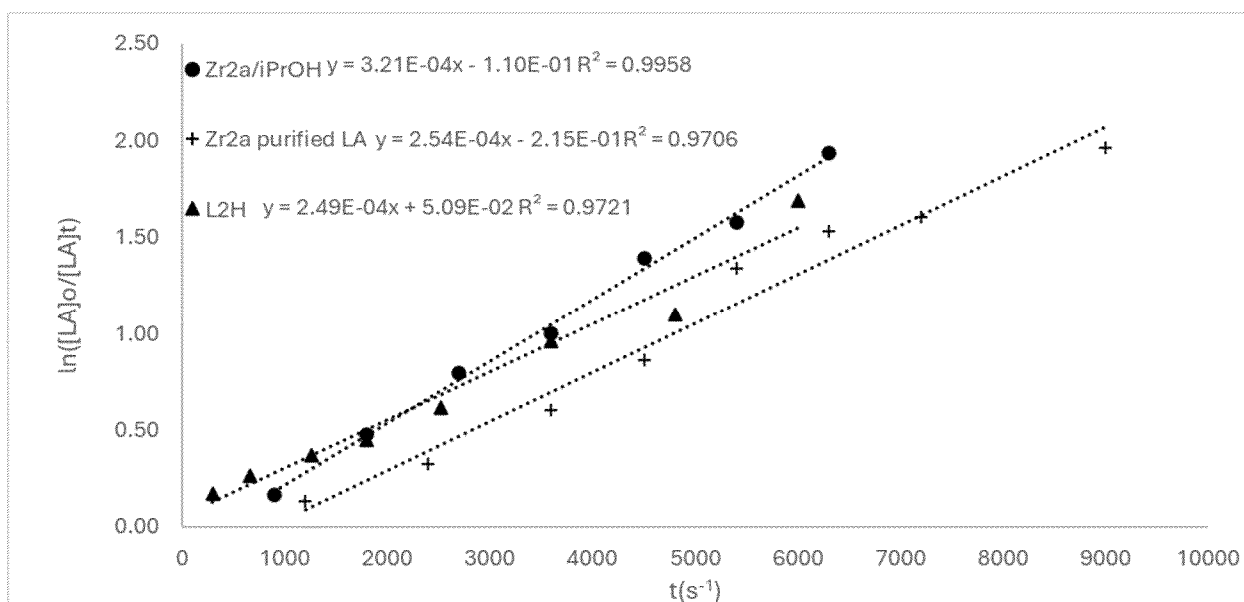

Figure S56. Kinetic plot for the polymerization of *rac*-lactide by L2H, Zr2a with purified monomer and Zr2a + <sup>i</sup>PrOH.

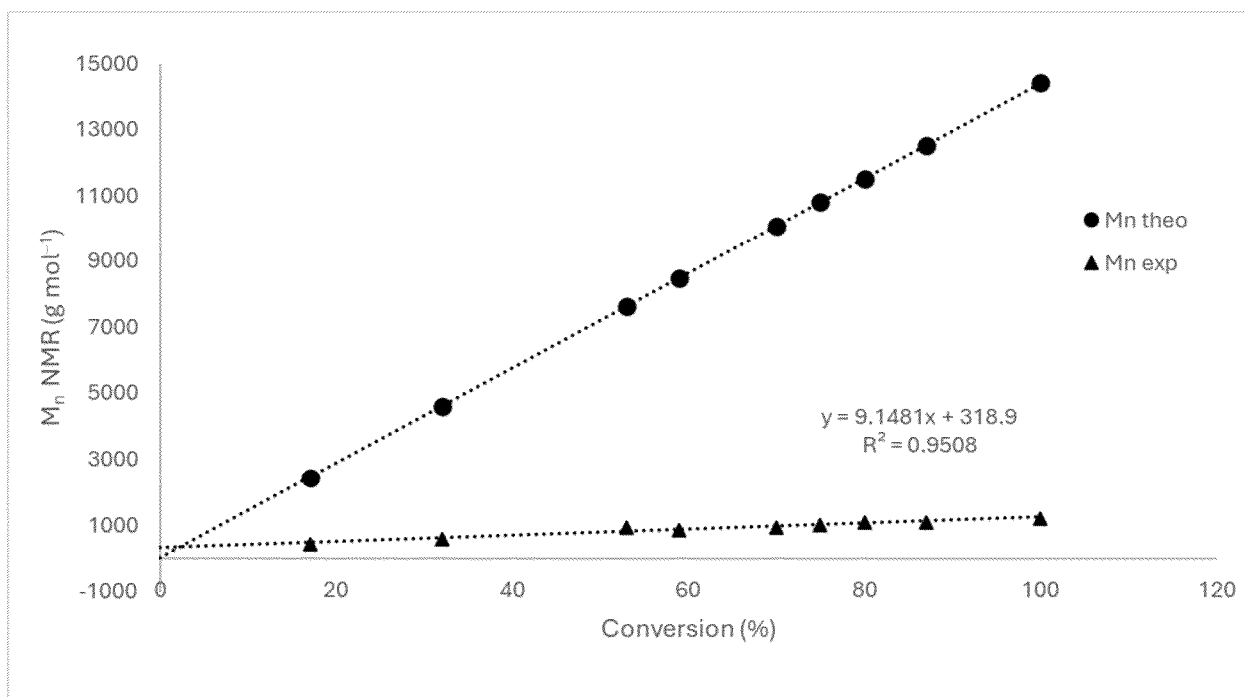

Figure S57. Number-average molecular weight of PLA produced by Zr2a as a function of conversion. The triangles (▲) represent the  $M_n$  measured by NMR end-group analysis. The circles (●) represent the theoretical  $M_n$  based on the initial LA:Zr ratio, assuming a living system.

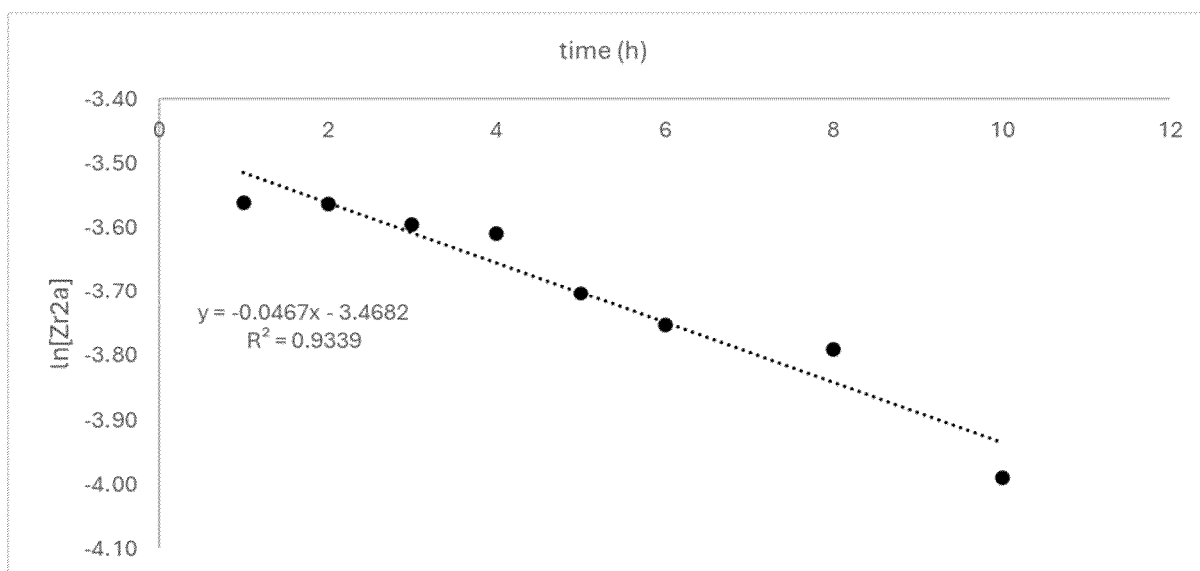

Figure S58. Decay Zr2a as a function of time when dissolved in toluene and heated to 120 °C.

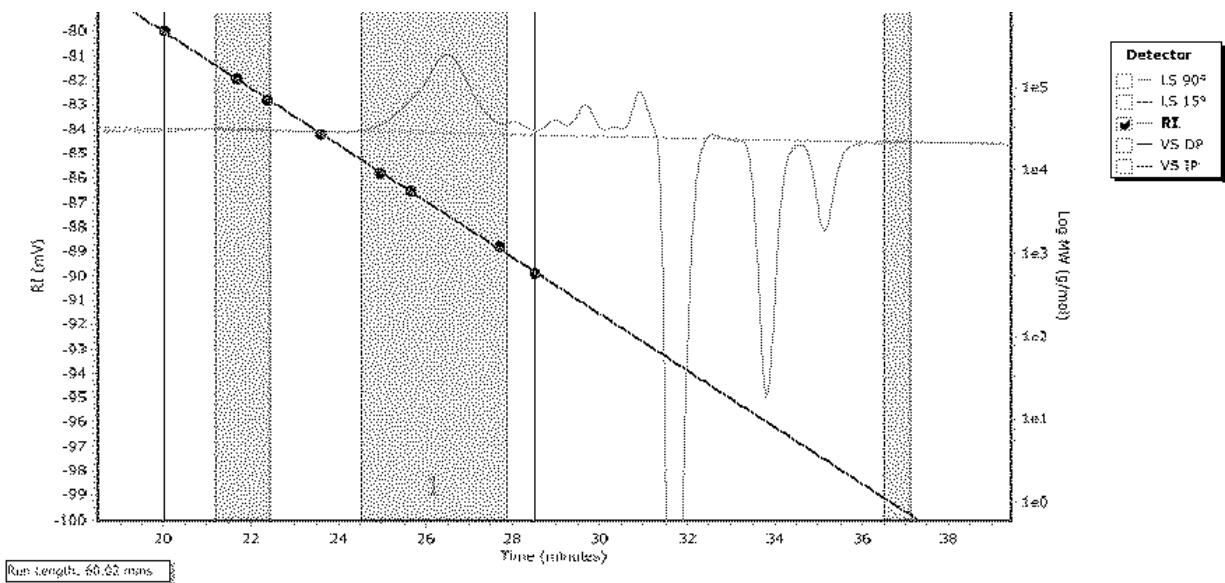

Figure S59. Representative GPC chromatogram plot of a polymer sample, herein obtained using complex Zr1a (entry 6).

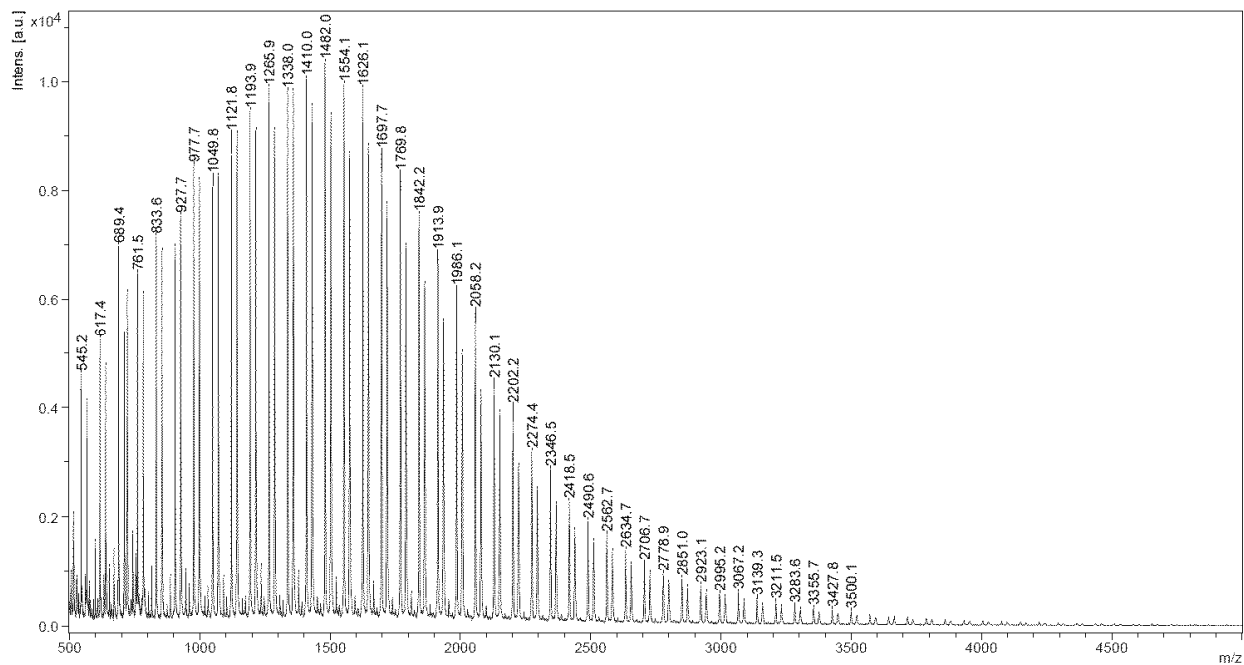

Figure S60. MALDI-TOF mass spectrum of the polymer obtained using complex Ti2a.

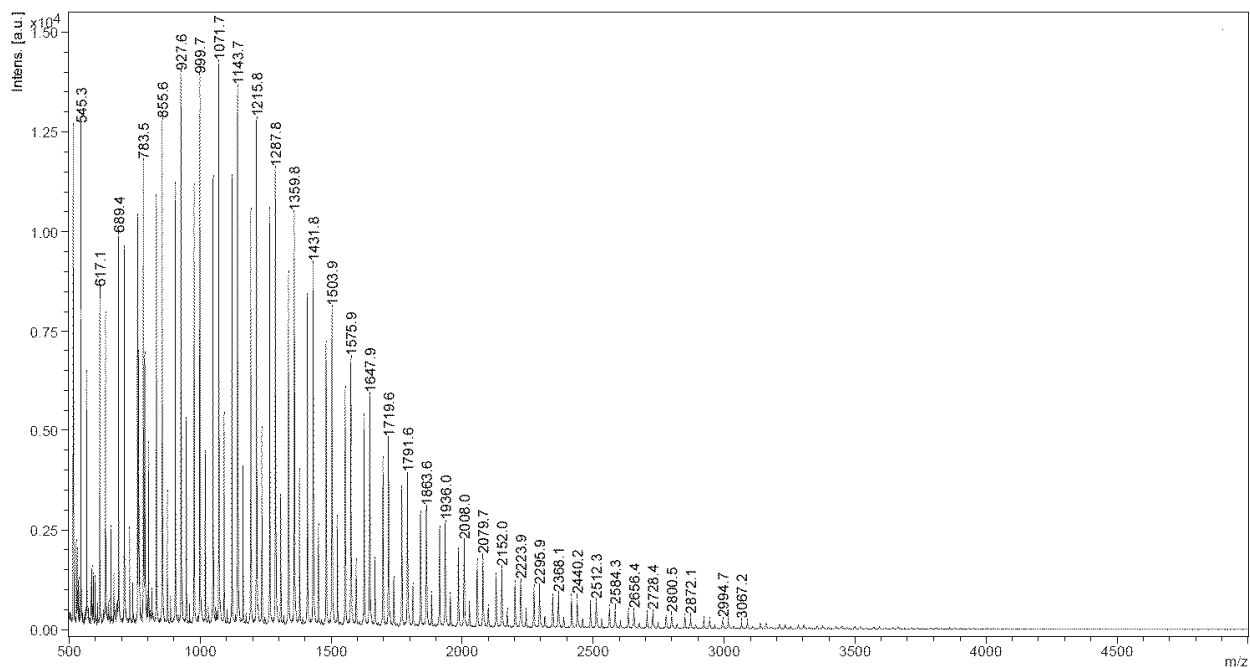

Figure S61. MALDI-TOF mass spectrum of the polymer obtained using complex Zr2a.

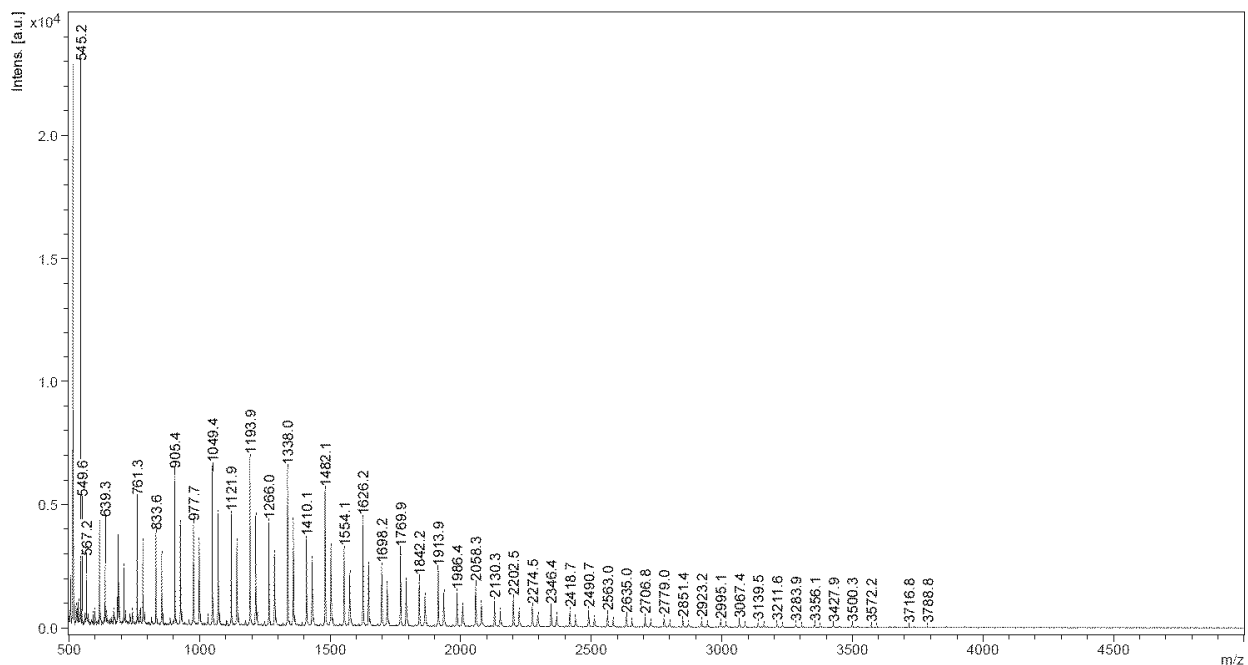

Figure S62. MALDI-TOF mass spectrum of the polymer obtained using complex L2H.

Table S1. Relative energies (kJ mol<sup>-1</sup>) of the five diastereoisomers for the bis(alkoxide) complexes Ti3a , Zr3a, and Ti4a

| Complex     | <i>cis</i> -O <sup>i</sup> Pr         |                                     |                                       | <i>trans</i> - O <sup>i</sup> Pr    |                                         |
|-------------|---------------------------------------|-------------------------------------|---------------------------------------|-------------------------------------|-----------------------------------------|
|             | <i>cis</i> -N,N-<br><i>trans</i> -O,O | <i>cis</i> -N,N-<br><i>cis</i> -O,O | <i>trans</i> -N,N-<br><i>cis</i> -O,O | <i>cis</i> -N,N-<br><i>cis</i> -O,O | <i>trans</i> -N,N-<br><i>trans</i> -O,O |
| <b>Ti3a</b> | 0.0                                   | 5                                   | 15                                    | 46                                  | 50                                      |
| <b>Zr3a</b> | 0.0                                   | 1                                   | 15                                    | 44                                  | 35                                      |
| <b>Ti4a</b> | 0.0                                   | 28                                  | 27                                    | 70                                  | 62                                      |

Table S2. Rate constant of the polymerization of *rac*-lactide

| entry <sup>a</sup> | Catalyst               | $k_{app}$<br>(10 <sup>-5</sup> s <sup>-1</sup> ) | $M_n^b$<br>(Da) | $M_w^b$<br>(Da) | $\mathcal{D}^c$ |
|--------------------|------------------------|--------------------------------------------------|-----------------|-----------------|-----------------|
| 1                  | <b>Ti2a</b>            | 1.42                                             | 2600            | 3600            | 1.4             |
| 2                  | <b>Zr2a</b>            | 2.03                                             | 2100            | 2900            | 1.4             |
| 3                  | <b>L2H<sup>d</sup></b> | 0.92                                             | 2800            | 3900            | 1.4             |

<sup>a</sup>All polymerization were carried out at 130 °C to full conversion and a lactide-to-catalyst stoichiometric ratio of 1000:1. <sup>b</sup>Determined by GPC in THF <sup>c</sup> $\mathcal{D} = M_w \div M_n$  as determined by GPC <sup>d</sup>Lactide:catalyst stoichiometric ratio of 500:1.

Table S3. Crystal data for Ti3a

|                                             |                                                                  |
|---------------------------------------------|------------------------------------------------------------------|
| Empirical formula                           | C <sub>28</sub> H <sub>42</sub> N <sub>6</sub> O <sub>4</sub> Ti |
| Formula weight                              | 574.57                                                           |
| Temperature/ K                              | 173.0                                                            |
| Crystal system                              | monoclinic                                                       |
| Space group                                 | P21/n                                                            |
| a/Å                                         | 23.2014(7)                                                       |
| b/Å                                         | 10.7004(3)                                                       |
| c/Å                                         | 24.3975(7)                                                       |
| α/°                                         | 90                                                               |
| β/°                                         | 95.7949(12)                                                      |
| γ/°                                         | 90                                                               |
| Volume/Å <sup>3</sup>                       | 6026.1(3)                                                        |
| Z                                           | 8                                                                |
| ρ <sub>calc</sub> /cm <sup>3</sup>          | 1.267                                                            |
| μ/mm <sup>-1</sup>                          | 0.326                                                            |
| F(000)                                      | 2448.0                                                           |
| Crystal size/mm <sup>3</sup>                | 0.1 × 0.1 × 0.1                                                  |
| Radiation                                   | MoKα (λ = 0.71073)                                               |
| 2θ range for data collection/°              | 5.076 to 60.066                                                  |
| Index ranges                                | -29 ≤ h ≤ 32, -15 ≤ k ≤ 15, -34 ≤ l ≤ 34                         |
| Reflections collected                       | 157194                                                           |
| Independent reflections                     | 17589 [R <sub>int</sub> = 0.0771, R <sub>sigma</sub> = 0.0307]   |
| Data/restraints/parameters                  | 17589/0/779                                                      |
| Goodness-of-fit on F <sup>2</sup>           | 1.131                                                            |
| Final R indexes [I ≥ 2σ (I)]                | R <sub>1</sub> = 0.0532, wR <sub>2</sub> = 0.1254                |
| Final R indexes [all data]                  | R <sub>1</sub> = 0.0643, wR <sub>2</sub> = 0.1316                |
| Largest diff. peak/hole / e Å <sup>-3</sup> | 0.43/-0.60                                                       |

Table S4. Crystal data for Zr3a

|                                             |                                                                  |
|---------------------------------------------|------------------------------------------------------------------|
| Empirical formula                           | C <sub>28</sub> H <sub>42</sub> N <sub>6</sub> O <sub>4</sub> Zr |
| Formula weight                              | 617.89                                                           |
| Temperature/K                               | 173.00                                                           |
| Crystal system                              | monoclinic                                                       |
| Space group                                 | P2 <sub>1</sub> /n                                               |
| a/Å                                         | 9.6548(4)                                                        |
| b/Å                                         | 15.7838(6)                                                       |
| c/Å                                         | 19.7193(7)                                                       |
| α/°                                         | 90                                                               |
| β/°                                         | 90.246(2)                                                        |
| γ/°                                         | 90                                                               |
| Volume/Å <sup>3</sup>                       | 3005.0(2)                                                        |
| Z                                           | 4                                                                |
| ρ <sub>calc</sub> /cm <sup>3</sup>          | 1.366                                                            |
| μ/mm <sup>-1</sup>                          | 0.408                                                            |
| F(000)                                      | 1296.0                                                           |
| Crystal size/mm <sup>3</sup>                | 0.4 × 0.4 × 0.1                                                  |
| Radiation                                   | MoKα (λ = 0.71073)                                               |
| 2θ range for data collection/°              | 4.218 to 55.134                                                  |
| Index ranges                                | -12 ≤ h ≤ 12, -20 ≤ k ≤ 20, -25 ≤ l ≤ 25                         |
| Reflections collected                       | 94441                                                            |
| Independent reflections                     | 6938 [R <sub>int</sub> = 0.1255, R <sub>sigma</sub> = 0.0549]    |
| Data/restraints/parameters                  | 6938/0/371                                                       |
| Goodness-of-fit on F <sup>2</sup>           | 1.049                                                            |
| Final R indexes [I ≥ 2σ (I)]                | R <sub>1</sub> = 0.0579, wR <sub>2</sub> = 0.0989                |
| Final R indexes [all data]                  | R <sub>1</sub> = 0.0975, wR <sub>2</sub> = 0.1138                |
| Largest diff. peak/hole / e Å <sup>-3</sup> | 1.10/-0.79                                                       |



Table S5. Crystal data for Ti4a

|                                             |                                                                  |
|---------------------------------------------|------------------------------------------------------------------|
| Empirical formula                           | C <sub>30</sub> H <sub>46</sub> N <sub>6</sub> O <sub>4</sub> Ti |
| Formula weight                              | 602.63                                                           |
| Temperature/K                               | 173.00                                                           |
| Crystal system                              | orthorhombic                                                     |
| Space group                                 | Pca2 <sub>1</sub>                                                |
| a/Å                                         | 14.5172(8)                                                       |
| b/Å                                         | 11.5840(6)                                                       |
| c/Å                                         | 19.1268(10)                                                      |
| α/°                                         | 90                                                               |
| β/°                                         | 90                                                               |
| γ/°                                         | 90                                                               |
| Volume/Å <sup>3</sup>                       | 3216.5(3)                                                        |
| Z                                           | 4                                                                |
| ρ <sub>calc</sub> /cm <sup>3</sup>          | 1.244                                                            |
| μ/mm <sup>-1</sup>                          | 0.309                                                            |
| F(000)                                      | 1288.0                                                           |
| Crystal size/mm <sup>3</sup>                | 0.2 × 0.2 × 0.1                                                  |
| Radiation                                   | MoKα (λ = 0.71073)                                               |
| 2θ range for data collection/°              | 4.498 to 55.106                                                  |
| Index ranges                                | -18 ≤ h ≤ 18, -14 ≤ k ≤ 15, -24 ≤ l ≤ 24                         |
| Reflections collected                       | 39189                                                            |
| Independent reflections                     | 7358 [R <sub>int</sub> = 0.0835, R <sub>sigma</sub> = 0.0610]    |
| Data/restraints/parameters                  | 7358/1/378                                                       |
| Goodness-of-fit on F <sup>2</sup>           | 1.053                                                            |
| Final R indexes [I ≥ 2σ (I)]                | R <sub>1</sub> = 0.0481, wR <sub>2</sub> = 0.1066                |
| Final R indexes [all data]                  | R <sub>1</sub> = 0.0924, wR <sub>2</sub> = 0.1296                |
| Largest diff. peak/hole / e Å <sup>-3</sup> | 0.44/-0.35                                                       |

Table S6. Crystal data for Ti2b

|                                             |                                                                                  |
|---------------------------------------------|----------------------------------------------------------------------------------|
| Empirical formula                           | C <sub>37</sub> H <sub>48</sub> Cl <sub>2</sub> N <sub>6</sub> O <sub>2</sub> Ti |
| Formula weight                              | 727.61                                                                           |
| Temperature/K                               | 173.00                                                                           |
| Crystal system                              | monoclinic                                                                       |
| Space group                                 | P2 <sub>1</sub> /n                                                               |
| a/Å                                         | 10.6343(7)                                                                       |
| b/Å                                         | 30.9675(18)                                                                      |
| c/Å                                         | 12.5823(8)                                                                       |
| α/°                                         | 90                                                                               |
| β/°                                         | 110.817(2)                                                                       |
| γ/°                                         | 90                                                                               |
| Volume/Å <sup>3</sup>                       | 3873.1(4)                                                                        |
| Z                                           | 4                                                                                |
| ρ <sub>calc</sub> /cm <sup>3</sup>          | 1.248                                                                            |
| μ/mm <sup>-1</sup>                          | 0.398                                                                            |
| F(000)                                      | 1536.0                                                                           |
| Crystal size/mm <sup>3</sup>                | 0.1 × 0.025 × 0.025                                                              |
| Radiation                                   | MoKα (λ = 0.71073)                                                               |
| 2θ range for data collection/°              | 4.304 to 61.016                                                                  |
| Index ranges                                | -15 ≤ h ≤ 15, -44 ≤ k ≤ 44, -17 ≤ l ≤ 17                                         |
| Reflections collected                       | 150839                                                                           |
| Independent reflections                     | 11792 [R <sub>int</sub> = 0.0482, R <sub>sigma</sub> = 0.0239]                   |
| Data/restraints/parameters                  | 11792/6/507                                                                      |
| Goodness-of-fit on F <sup>2</sup>           | 1.191                                                                            |
| Final R indexes [I ≥ 2σ (I)]                | R <sub>1</sub> = 0.0600, wR <sub>2</sub> = 0.1306                                |
| Final R indexes [all data]                  | R <sub>1</sub> = 0.0700, wR <sub>2</sub> = 0.1352                                |
| Largest diff. peak/hole / e Å <sup>-3</sup> | 0.52/-0.53                                                                       |
